# Supplementary material for: Duplication events downstream of IRX1 cause North Carolina macular dystrophy at the MCDR3 locus
Source: PubMed Central journal article supplement (PMC5548758; doi:10.1038/s41598-017-06387-6), 2017-08-08
Supplement: 41598_2017_6387_MOESM1_ESM.pdf [file 41598_2017_6387_MOESM1_ESM.pdf]

## SUPPLEMENTARY MATERIALS

### **Duplication events downstream of *IRX1* cause North Carolina macular dystrophy at the MCDR3 locus**

Valentina Cipriani,<sup>1,2,3,§</sup> Raquel S Silva,<sup>1,2,§</sup> Gavin Arno,<sup>1,2</sup> Nikolas Pontikos,<sup>1,3</sup> Ambreen Kalhoro,<sup>1,2</sup> Sandra Valeina,<sup>4</sup> Inna Inashkina,<sup>5</sup> Mareta Audere,<sup>5,6</sup> Katrina Rutka,<sup>5,6</sup> Bernard Puech,<sup>7</sup> Michel Michaelides,<sup>1,2</sup> Veronica van Heyningen,<sup>1</sup> Baiba Lace,<sup>5,8</sup> Andrew R Webster,<sup>1,2</sup> Anthony T Moore<sup>1,2,9</sup>

<sup>1</sup>UCL Institute of Ophthalmology, London, UK, <sup>2</sup>Moorfields Eye Hospital, London, UK, <sup>3</sup>UCL Genetics Institute, London, UK, <sup>4</sup>Children's Clinical University Hospital, Riga, Latvia, <sup>5</sup>Latvian Biomedical Research and Study Centre, Riga, Latvia, <sup>6</sup>Riga Stradins University, Riga, Latvia, <sup>7</sup>Exploration de la Vision et Neuro-Ophthalmologie, Centre Hospitalier Universitaire, Lille, France <sup>8</sup>Centre Hospitalier de l'Université Laval, Québec, Canada, <sup>9</sup>Ophthalmology Department, UCSF School of Medicine, San Francisco, CA, USA

<sup>§</sup>These authors contributed equally to this work

**Supplementary Figures S1-S11**

**Supplementary Tables S1-S2**

**Supplementary Figure S1** Pedigree structures of families 1-13. Black solid and open symbols indicate affected and unaffected individuals respectively. Grey solid symbols indicate family members with unknown disease status. SNP, aCGH and WGS indicate the individual was studied using Illumina single-nucleotide polymorphism array data, array-based comparative genomic hybridization and whole-genome sequencing, respectively. The symbols +/- and -/- indicate presence and absence of either the 43 kb or 45 kb duplications at the 5p15 locus, or the previously reported single nucleotide V2 variant upstream of *PRDM13* at the 6q16 locus.<sup>1</sup>

### Family 1 (GC19806)



### Family 2 (GC15626)



### Family 3 (GC15119)



### Family 4 (GC13840)



### Family 5 (GC19075)



**Family 6 (GC15475)**



**Family 7 (GC11709)**



**Family 8 (GC16913)**



**Family 9 (GC4092)**



**Family 10 (GC23501)**



**Family 11 (GC15416)**



### Family 12 (GC3722)



Family 13 (GC17225)



## Regions with a Conserved Homozygote Haplotype (RCHH)



**Supplementary Figure S2** Identification of the disease candidate regions for family 1 (GC19806) using the Homozygosity Haplotype (HH) approach.<sup>2</sup> Five affected family members were included in the analysis. A densitogram of the genomic Regions with a Conserved Homozygosity Haplotype (RCHH) is depicted. The darker the colour, the more individuals share a HH in the region. Black regions indicate RCHH that are shared by all 5 affected family members included in the analysis.

### Regions with a Conserved Homozygote Haplotype (RCHH)



**Supplementary Figure S3** Identification of the disease candidate regions for family 2 (GC15626) using the Homozygosity Haplotype (HH) approach.<sup>2</sup> Two affected family members were included in the analysis. A densitogram of the genomic Regions with a Conserved Homozygosity Haplotype (RCHH) is depicted. The darker the colour, the more individuals share a HH in the region. Black regions indicate RCHH that are shared by both affected family members included in the analysis.



### Regions with a Conserved Homozygote Haplotype (RCHH)



**Supplementary Figure S4** Identification of the disease candidate regions for family 3 (GC15119) using the Homozygosity Haplotype (HH) approach.<sup>2</sup> Four affected family members were included in the analysis. A densitogram of the genomic Regions with a Conserved Homozygosity Haplotype (RCHH) is depicted. The darker the colour, the more individuals share a HH in the region. Black regions indicate RCHH that are shared by all 4 affected family members included in the analysis.

### Regions with a Conserved Homozygote Haplotype (RCHH)



**Supplementary Figure S5** Identification of the disease candidate regions for family 4 (GC13840) using the Homozygosity Haplotype (HH) approach.<sup>2</sup> Three affected family members were included in the analysis. A densitogram of the genomic Regions with a Conserved Homozygosity Haplotype (RCHH) is depicted. The darker the colour, the more individuals share a HH in the region. Black regions indicate RCHH that are shared by all 3 affected family members included in the analysis.

### Regions with a Conserved Homozygote Haplotype (RCHH)



**Supplementary Figure S6** Identification of the disease candidate regions for family 5 (GC19075) using the Homozygosity Haplotype (HH) approach.<sup>2</sup> Three affected family members were included in the analysis. A densitogram of the genomic Regions with a Conserved Homozygosity Haplotype (RCHH) is depicted. The darker the colour, the more individuals share a HH in the region. Black regions indicate RCHH that are shared by all 3 affected family members included in the analysis.

### Regions with a Conserved Homozygote Haplotype (RCHH)



**Supplementary Figure S7** Identification of the disease candidate regions for family 12 (GC3722) using the Homozygosity Haplotype (HH) approach.<sup>2</sup> Five affected family members were included in the analysis. A densitogram of the genomic Regions with a Conserved Homozygosity Haplotype (RCHH) is depicted. The darker the colour, the more individuals share a HH in the region. Black regions indicate RCHH that are shared by all 5 affected family members included in the analysis.

### Regions with a Conserved Homozygote Haplotype (RCHH)



**Supplementary Figure S8** Identification of the disease candidate regions for family 13 (GC17225) using the Homozygosity Haplotype (HH) approach.<sup>2</sup> Eight affected family members were included in the analysis. A densitogram of the genomic Regions with a Conserved Homozygosity Haplotype (RCHH) is depicted. The darker the colour, the more individuals share a HH in the region. Black regions indicate RCHH that are shared by all 8 affected family members included in the analysis.

## Regions with a Conserved Homozygote Haplotype (RCHH)



**Supplementary Figure S9** Homozygosity Haplotype (HH) analysis<sup>2</sup> on a total of 14 affected individuals in 3 families (11-13) carrying the previously reported 6q16 V2 variant<sup>1</sup> and with available Illumina SNP array data. A densitogram of the genomic Regions with a Conserved Homozygosity Haplotype (RCHH) is depicted. The darker the colour, the more individuals share a HH in the region. All 14 genotyped individuals collectively shared a RCHH from GRCh37/hg19 coordinate 98962591 (rs150396) to 101468591 (rs1321204) at the MCDR1 locus.

## Regions with a Conserved Homozygote Haplotype (RCHH)



**Supplementary Figure S10** Homozygosity Haplotype (HH) analysis<sup>2</sup> on a total of 14 affected individuals in 6 families (2-7) carrying the 5p15 43 kb duplication reported in this study and with available Illumina SNP array data. A densitogram of the genomic Regions with a Conserved Homozygosity Haplotype (RCHH) is depicted. The darker the colour, the more individuals share a HH in the region. All 14 genotyped individuals collectively shared a RCHH from GRCh37/hg19 coordinate 4325295 (rs155353) to 5210315 (rs7704912) at the MCDR3 locus.



**Supplementary Figure S11** Human fetal expression of *IRX1* and *ADAMTS16* in macula, nasal and surrounding retina. GENEVESTIGATOR<sup>3</sup> was used to query microarray datasets for expression of genes surrounding the duplication events at the MCDR3 locus. Fetal tissue used was 19-20 weeks post gestation.<sup>4</sup> *IRX1* is highly expressed in fetal macula, whereas *ADAMTS16* is moderately expressed without geographic specificity.



**Supplementary Table S1** Region with a Conserved Homozygosity Haplotype<sup>1</sup> (HH) at the MCDR1 locus shared by 14 affected individuals from families 11-13 with available Illumina SNP array data. The HH is a type of haplotype described by the homozygous SNPs only (all heterozygous SNPs are removed) and, therefore, can be uniquely determined on each chromosome. Genotypes are displayed vertically per each individual (A=AA, B=BB, blank cells=AB). The start and end of the shared HH are marked with a red bold line.

| Chromosome | Physical position (hg19) | Genetic map | rs number  | Allele A frequency | Family 11 (GC15416) | Family 12 (GC3722) |      |      |      |       | Family 13 (GC17225) |       |      |        |       |       |       |        |   |   |
|------------|--------------------------|-------------|------------|--------------------|---------------------|--------------------|------|------|------|-------|---------------------|-------|------|--------|-------|-------|-------|--------|---|---|
|            |                          |             |            |                    | III:3               | III:11             | IV:2 | II:7 | IV:6 | IV:13 | IV:57               | IV:58 | II:9 | III:27 | IV:56 | III:6 | IV:13 | III:14 |   |   |
| 6          | 98935791                 | 103.6579    | rs1494779  | 0.222              |                     | B                  | B    | B    | B    | B     |                     |       |      |        |       |       |       |        |   |   |
| 6          | 98936578                 | 103.6583    | rs9321067  | 0.071              | B                   | B                  | B    |      | B    | B     | B                   | B     | B    | B      | B     | B     | B     | B      | B | B |
| 6          | 98938023                 | 103.767     | rs17058578 | 0.131              | B                   | B                  | B    | B    | B    | B     | B                   | B     | B    | B      | B     | B     | B     | B      | B | B |
| 6          | 98938237                 | 103.7861    | rs9401901  | 0.477              | B                   | B                  |      | B    |      | B     | B                   | B     |      | B      |       |       |       |        |   |   |
| 6          | 98938249                 | 103.7872    | rs9388508  | 0.165              | B                   | B                  | B    | B    | B    | B     | B                   | B     | B    | B      | B     | B     | B     | B      | B | B |
| 6          | 98938834                 | 103.8382    | rs2227121  | 0.513              | B                   | B                  |      | B    |      |       | B                   | B     | B    | B      | B     | B     | B     | B      | B | B |
| 6          | 98949550                 | 103.845     | rs158773   | 0.376              | B                   | B                  |      | B    |      |       | B                   | B     | B    |        | B     |       |       |        |   |   |
| 6          | 98953633                 | 103.8464    | rs158774   | 0.65               |                     |                    | A    | A    | A    |       |                     | B     | B    | B      | B     | B     | B     | B      | B | B |
| 6          | 98959605                 | 103.8494    | rs158777   | 0.442              |                     |                    |      | A    |      |       |                     | B     | B    | B      | B     | B     | B     | B      | B | B |
| 6          | 98962591                 | 103.9024    | rs150396   | 0.301              |                     |                    |      | B    |      |       | B                   | B     | B    | B      | B     | B     | B     | B      | B | B |
| 6          | 98971740                 | 103.9045    | rs1481449  | 0.031              | B                   | B                  | B    | B    | B    | B     | B                   | B     | B    | B      | B     | B     | B     | B      | B | B |
| 6          | 98975810                 | 103.9049    | rs211215   | 0.695              |                     |                    |      | A    |      |       | A                   | A     | A    | A      | A     | A     | A     | A      | A | A |
| 6          | 98978496                 | 103.9055    | rs11961327 | 0.031              |                     | B                  | B    | B    | B    | B     | B                   | B     | B    | B      | B     | B     | B     | B      | B | B |
| 6          | 98980147                 | 103.9057    | rs211222   | 0.164              |                     |                    |      |      |      |       |                     |       |      |        |       |       |       |        |   |   |
| 6          | 98991464                 | 103.9078    | rs17058667 | 0.299              |                     |                    |      | B    |      |       | B                   | B     | B    | B      | B     | B     | B     | B      | B | B |
| 6          | 98992369                 | 103.9079    | rs183316   | 0.292              |                     |                    |      | B    |      |       | B                   | B     | B    | B      | B     | B     | B     | B      | B | B |
| 6          | 99001499                 | 103.9107    | rs211227   | 0.889              |                     | A                  | A    | A    | A    | A     | A                   | A     | A    | A      | A     | A     | A     | A      | A | A |
| 6          | 99004191                 | 103.9111    | rs9372864  | 0.545              | B                   | B                  | B    |      | B    | B     |                     |       |      |        |       |       |       |        |   |   |
| 6          | 99013740                 | 103.9183    | rs2046174  | 0.832              | B                   |                    |      |      |      |       |                     |       |      |        |       |       |       |        |   |   |
| 6          | 99017732                 | 103.9544    | rs17829357 | 0.115              |                     | B                  | B    | B    | B    | B     | B                   | B     | B    | B      | B     | B     | B     | B      | B | B |
| 6          | 99019431                 | 103.9548    | rs9491794  | 0.262              |                     |                    |      |      |      | A     |                     |       |      |        |       |       |       |        |   |   |
| 6          | 99032723                 | 103.9592    | rs1481440  | 0.788              | A                   | A                  | A    | A    | A    |       | A                   | A     |      | A      | A     | A     | A     | A      | A | A |
| 6          | 99033489                 | 103.9596    | rs11752460 | 0.823              | B                   |                    |      |      |      |       |                     |       |      |        |       |       |       |        |   |   |
| 6          | 99034313                 | 103.9611    | rs1481438  | 0.622              | B                   |                    |      |      |      | B     |                     |       | B    |        |       |       |       | B      | B | B |
| 6          | 99045749                 | 103.9622    | rs6929790  | 0.788              | A                   | A                  | A    | A    | A    |       | A                   | A     |      | A      | A     | A     | A     | A      | A | A |
| 6          | 99050825                 | 103.9628    | rs17830067 | 0.146              | A                   |                    |      |      |      |       |                     |       |      |        |       |       |       |        |   |   |
| 6          | 99058170                 | 103.9632    | rs969540   | 0.138              | A                   |                    |      |      |      |       |                     |       |      |        |       |       |       |        |   |   |
| 6          | 99076746                 | 103.9642    | rs17058737 | 0.847              | B                   |                    |      |      |      |       |                     |       |      |        |       |       |       |        |   |   |
| 6          | 99092539                 | 103.9699    | rs17058761 | 0.156              | A                   |                    |      |      |      |       |                     |       |      |        |       |       |       |        |   |   |
| 6          | 99124184                 | 103.9844    | rs11752997 | 0.854              | A                   | A                  | A    | A    | A    |       | A                   | A     | A    | A      | A     | A     | A     | A      | A | A |
| 6          | 99126082                 | 103.9857    | rs4472356  | 0.587              | B                   |                    |      |      |      | B     |                     |       | B    |        |       |       |       |        |   |   |
| 6          | 99138875                 | 103.9982    | rs12204275 | 0.42               | B                   | B                  | B    | B    | B    |       | B                   | B     | B    | B      | B     | B     | B     | B      | B | B |
| 6          | 99139350                 | 103.9989    | rs6939572  | 0.593              |                     |                    |      |      |      | B     |                     |       | B    |        |       |       |       |        |   |   |
| 6          | 99140492                 | 104.0015    | rs6924761  | 0.159              | B                   | B                  | B    | B    | B    | B     | B                   | B     | B    | B      | B     | B     | B     | B      | B | B |
| 6          | 99147074                 | 104.0354    | rs4424090  | 0.031              | B                   | B                  | B    | B    | B    | B     | B                   | B     | B    | B      | B     | B     | B     | B      | B | B |
| 6          | 99170039                 | 104.0781    | rs9375604  | 0.934              | A                   | A                  | A    | A    | A    | A     | A                   | A     |      | A      | A     |       |       | A      | A | A |
| 6          | 99173425                 | 104.0791    | rs4529305  | 0.92               | A                   | A                  | A    | A    | A    | A     |                     |       |      | A      |       |       |       | A      | A | A |
| 6          | 99175625                 | 104.081     | rs9388676  | 0.128              | B                   | B                  | B    | B    | B    | B     | B                   | B     | B    | B      | B     | B     | B     | B      | B | B |
| 6          | 99195548                 | 104.0849    | rs11154467 | 0.717              |                     | A                  | A    |      | A    | A     | A                   | A     | A    | A      | A     | A     | A     | A      | A | A |
| 6          | 99203222                 | 104.0866    | rs4406241  | 0.159              | B                   | B                  | B    | B    | B    | B     | B                   | B     |      |        | B     |       |       | B      | B | B |
| 6          | 99214884                 | 104.0911    | rs7762570  | 0.496              |                     | B                  | B    |      | B    |       | B                   | B     |      | B      |       |       |       | B      | B | B |
| 6          | 99218958                 | 104.1162    | rs4839976  | 0.473              |                     | B                  | B    |      | B    |       | B                   | B     |      | B      |       |       |       | B      | B | B |
| 6          | 99219522                 | 104.1599    | rs4398748  | 0.92               | A                   | A                  | A    | A    | A    | A     | A                   | A     | A    | A      | A     | A     | A     | A      | A | A |
| 6          | 99221669                 | 104.1936    | rs9385493  | 0.396              | B                   | B                  | B    |      | B    |       | B                   | B     | B    | B      | B     | B     | B     | B      | B | B |
| 6          | 99226729                 | 104.1955    | rs10499023 | 0.719              | B                   | B                  |      |      |      |       |                     |       |      |        |       |       |       | B      | B | B |
| 6          | 99229574                 | 104.1966    | rs4839977  | 0.243              | B                   | B                  |      | B    |      |       |                     |       | B    | B      |       |       |       | B      | B | B |
| 6          | 99230880                 | 104.197     | rs4555920  | 0.566              | A                   | A                  | A    |      | A    |       | A                   | A     |      |        | A     | A     | A     | A      | A | A |
| 6          | 99235909                 | 104.2181    | rs9375642  | 0.761              | A                   | A                  | A    |      | A    |       |                     |       |      | A      |       |       |       | A      | A | A |
| 6          | 99236649                 | 104.2193    | rs9402154  | 0.429              | A                   | A                  | A    |      | A    |       |                     |       |      | A      |       |       |       | A      | A | A |
| 6          | 99237315                 | 104.22      | rs9388719  | 0.668              | A                   | A                  | A    |      | A    |       | A                   | A     | A    | A      | A     | A     | A     | A      | A | A |
| 6          | 99237479                 | 104.2201    | rs12174549 | 0.838              | A                   | A                  | A    |      | A    |       |                     |       |      | A      |       |       |       | A      | A | A |
| 6          | 99242592                 | 104.2211    | rs7762652  | 0.661              | A                   | A                  | A    |      | A    |       | A                   | A     | A    | A      | A     | A     | A     | A      | A | A |
| 6          | 99250916                 | 104.2243    | rs9385517  | 0.204              | B                   | B                  | B    | B    | B    |       |                     |       |      | B      |       |       |       | B      | B | B |
| 6          | 99251754                 | 104.2245    | rs4839986  | 0.633              | A                   | A                  | A    |      | A    |       | A                   | A     | A    | A      | A     | A     | A     | A      | A | A |
| 6          | 99258445                 | 104.2251    | rs6569636  | 0.327              | B                   | B                  | B    |      | B    |       | B                   | B     | B    | B      | B     | B     | B     | B      | B | B |
| 6          | 99270438                 | 104.2269    | rs9375688  | 0.393              | A                   | A                  | A    |      | A    |       |                     |       |      | A      |       |       |       | A      | A | A |
| 6          | 99270533                 | 104.227     | rs9375689  | 0.673              | A                   | A                  | A    |      | A    |       | A                   | A     | A    | A      | A     | A     | A     | A      | A | A |
| 6          | 99275290                 | 104.2312    | rs2444935  | 0.164              | B                   | B                  | B    | B    | B    |       |                     |       |      | B      |       |       |       | B      | B | B |
| 6          | 99277867                 | 104.2334    | rs1869641  | 0.407              | B                   | B                  | B    |      | B    |       | B                   | B     | B    | B      | B     | B     | B     | B      | B | B |
| 6          | 99279449                 | 104.234     | rs1883306  | 0.956              | A                   | A                  | A    | A    | A    |       | A                   | A     | A    | A      | A     | A     | A     | A      | A | A |
| 6          | 99284532                 | 104.2365    | rs3823036  | 0.699              | B                   | B                  | B    |      | B    |       |                     |       |      |        |       |       |       | B      | B | B |
| 6          | 99290334                 | 104.2388    | rs195853   | 0.155              | B                   | B                  | B    | B    | B    |       |                     |       |      | B      |       |       |       | B      | B | B |
| 6          | 99290592                 | 104.2389    | rs195852   | 0.403              | B                   | B                  | B    |      | B    |       | B                   | B     | B    | B      | B     | B     | B     | B      | B | B |
| 6          | 99294322                 | 104.2405    | rs195851   | 0.531              | A                   | A                  | A    |      | A    |       | A                   | A     | A    | A      | A     | A     | A     | A      | A | A |
| 6          | 99309057                 | 104.2804    | rs174447   | 0.058              | B                   | B                  | B    | B    | B    | B     | B                   | B     | B    | B      | B     | B     | B     | B      | B | B |
| 6          | 99320715                 | 104.2812    | rs9388789  | 0.09               | B                   | B                  | B    | B    | B    | B     | B                   | B     |      | B      | B     | B     | B     | B      | B | B |
| 6          | 99323424                 | 104.2812    | rs11537982 | 0.062              | B                   | B                  | B    | B    | B    | B     | B                   | B     | B    | B      | B     | B     | B     | B      | B | B |
| 6          | 99326490                 | 104.2812    | rs9375728  | 0.885              | A                   | A                  | A    | A    | A    | A     | A                   | A     |      | A      | A     | A     | A     | A      | A | A |
| 6          | 99328730                 | 104.284     | rs195831   | 0.637              | B                   | B                  | B    |      | B    |       | B                   | B     | B    |        | B     |       |       | B      | B | B |
| 6          | 99336279                 | 104.284     | rs10484609 | 0.85               | A                   | A                  | A    | A    | A    | A     | A                   | A     |      | A      | A     | A     | A     | A      | A | A |
| 6          | 99346145                 | 104.2845    | rs7739884  | 0.429              | B                   | B                  | B    | B    | B    | B     | B                   | B     | B    | B      | B     | B     | B     | B      | B | B |
| 6          | 99374400                 | 104.2862    | rs1011676  | 0.071              | B                   | B                  | B    | B    | B    | B     | B                   | B     | B    | B      | B     | B     | B     | B      | B | B |
| 6          | 99431200                 | 104.2903    | rs17058986 | 1                  | A                   | A                  | A    | A    | A    | A     | A                   | A     | A    | A      | A     | A     | A     | A      | A | A |
| 6          | 99432747                 | 104.2906    | rs196959   | 0.377              | A                   | A                  | A    |      | A    |       | A                   | A     | A    |        | A     |       |       | A      | A | A |
| 6          | 99433614                 | 104.2908    | rs196960   | 0.881              | A                   | A                  | A    | A    | A    |       |                     |       |      | A      |       |       |       | A      | A | A |
| 6          | 99437566                 | 104.2928    | rs2747734  | 0.473              | B                   | B                  | B    |      | B    |       | B                   | B     | B    |        | B     |       |       | B      | B | B |
| 6          | 99440369                 | 104.2932    | rs2572109  | 0.093              | B                   | B                  | B    | B    | B    | B     | B                   | B     | B    | B      | B     | B     | B     | B      | B | B |
| 6          | 99441083                 | 104.2937    | rs12200990 | 0.404              | B                   | B                  | B    | B    | B    | B     | B                   | B     | B    | B      | B     | B     | B     | B      | B | B |
| 6          | 99450081                 | 104.2967    | rs2180046  | 0.21               | B                   |                    |      | B    | B    |       |                     |       |      | B      | B     |       |       | B      | B | B |
| 6          | 99462075                 | 104.2976    | rs2747739  | 0.296              | A                   |                    |      | A    | A    |       |                     |       |      | A      |       |       |       | A      | A | A |
| 6          | 99462324                 | 104.2977    | rs9402354  | 0.81               | B                   |                    |      |      | B    |       |                     |       |      |        |       |       |       |        | B | B |
| 6          | 99463771                 | 104.298     | rs9375844  | 0.265              | A                   |                    |      | A    | A    |       |                     |       |      |        |       |       |       | A      | A | A |
| 6          | 99464542                 | 104.2983    | rs2207446  | 0.258              | B                   |                    |      | B    | B    |       |                     |       | B    |        |       |       |       | B      | B | B |
| 6          | 99467661                 | 104.2997    | rs12173555 | 0.102              | B                   | B                  | B    | B    | B    | B     | B                   | B     | B    | B      | B     | B     | B     | B      | B | B |
| 6          | 99468942                 | 104.3004    | rs9388950  | 0.336              | A                   |                    |      | A    | A    |       |                     |       |      | A      |       |       |       | A      | A | A |
| 6          | 99473410                 | 104.3017    | rs2092772  | 0.354              | B                   | B                  | B    | B    | B    | B     | B                   | B     | B    | B      | B     | B     | B     | B      | B | B |
| 6          | 99478174                 | 104.3023    | rs12201236 | 0.308              | B                   | B                  | B    | B    | B    | B     | B                   | B     | B    | B      | B     | B     | B     | B      | B | B |
| 6          | 99478304                 | 104.3024    | rs4839737  | 0.062              | B                   | B                  | B    | B    | B    | B     | B                   | B     | B    | B      | B     | B     | B     | B      | B | B |
| 6          | 99479842                 | 104.3085    | rs2747748  | 0.7                |                     |                    |      |      |      |       |                     |       |      |        |       |       |       |        |   |   |



| Chromosome | Physical position (hg19) | Genetic map | rs number  | Allele A frequency | Family 11 (GC15416) | Family 12 (GC3722) |      |      |      |       | Family 13 (GC17225) |       |      |        |       |       |       |        |
|------------|--------------------------|-------------|------------|--------------------|---------------------|--------------------|------|------|------|-------|---------------------|-------|------|--------|-------|-------|-------|--------|
|            |                          |             |            |                    | III:3               | III:11             | IV:2 | II:7 | IV:6 | IV:13 | IV:57               | IV:58 | II:9 | III:27 | IV:56 | III:6 | IV:13 | III:14 |
| 6          | 100108500                | 104.6449    | rs13193313 | 0.9                | A                   |                    | A    | A    | A    |       |                     |       | A    | A      |       | A     | A     | A      |
| 6          | 100116092                | 104.6739    | rs9321659  | 0.116              | B                   | B                  |      | B    | B    |       | B                   | B     | B    | B      | B     | B     | B     | B      |
| 6          | 100125119                | 104.6744    | rs650783   | 0.792              | A                   | A                  | A    | A    | A    | A     | A                   | A     | A    | A      | A     | A     | A     | A      |
| 6          | 100129570                | 104.6745    | rs9373217  | 0.044              | B                   | B                  | B    | B    | B    | B     | B                   | B     | B    | B      | B     | B     | B     | B      |
| 6          | 100129959                | 104.6745    | rs503649   | 0.77               | A                   | A                  | A    | A    | A    | A     | A                   | A     | A    | A      | A     | A     | A     | A      |
| 6          | 100130991                | 104.6745    | rs472977   | 0.199              | B                   | B                  | B    | B    | B    | B     | B                   | B     | B    | B      | B     | B     | B     | B      |
| 6          | 100131219                | 104.6745    | rs9495145  | 0.049              | B                   | B                  | B    | B    | B    | B     | B                   | B     | B    | B      | B     | B     | B     | B      |
| 6          | 100132920                | 104.6753    | rs9376355  | 0.954              | A                   | A                  | A    | A    | A    | A     | A                   | A     | A    | A      | A     | A     | A     | A      |
| 6          | 100161035                | 104.6765    | rs12661094 | 0.54               | B                   |                    |      | B    |      |       |                     |       | B    | B      |       |       |       | B      |
| 6          | 100172277                | 104.6779    | rs12211649 | 0.066              | B                   | B                  |      | B    |      | B     | B                   | B     | B    | B      | B     | B     | B     | B      |
| 6          | 100173173                | 104.6779    | rs4839755  | 0.212              | B                   |                    | B    | B    | B    |       |                     |       | B    | B      |       |       |       | B      |
| 6          | 100173832                | 104.6779    | rs9389645  | 0.681              | A                   | A                  |      | A    |      | A     | A                   | A     | A    | A      | A     | A     | A     | A      |
| 6          | 100174464                | 104.678     | rs6916754  | 0.044              | B                   | B                  | B    | B    | B    | B     | B                   | B     | B    | B      | B     | B     | B     | B      |
| 6          | 100185261                | 104.6783    | rs6908196  | 0.575              | B                   |                    |      | B    |      |       |                     |       | B    | B      |       |       |       | B      |
| 6          | 100187748                | 104.6827    | rs12527523 | 0.274              | B                   | B                  |      | B    |      | B     | B                   | B     | B    | B      | B     | B     | B     | B      |
| 6          | 100192215                | 104.6875    | rs12525414 | 0.738              | A                   | A                  |      | A    |      | A     | A                   | A     | A    | A      | A     | A     | A     | A      |
| 6          | 100195578                | 104.6879    | rs17826560 | 0.765              | A                   |                    | A    | A    | A    |       |                     |       | A    | A      |       |       |       | A      |
| 6          | 100197285                | 104.6881    | rs7742890  | 0.73               | A                   | A                  |      | A    |      | A     | A                   | A     | A    | A      | A     | A     | A     | A      |
| 6          | 100197712                | 104.6883    | rs7356874  | 0.058              | B                   | B                  | A    | B    | B    | B     | B                   | B     | B    | B      | B     | B     | B     | B      |
| 6          | 100206681                | 104.6904    | rs10485226 | 0.226              | A                   |                    |      |      |      |       |                     |       | A    |        |       |       |       |        |
| 6          | 100207327                | 104.6905    | rs10485227 | 0.54               | B                   | B                  |      |      |      | B     | B                   | B     |      | B      | B     | B     |       |        |
| 6          | 100207838                | 104.6906    | rs4388294  | 0.721              | A                   | A                  | A    |      | A    | A     | A                   | A     | A    | A      | A     | A     | A     | A      |
| 6          | 100208624                | 104.6908    | rs17059765 | 0.973              | A                   | A                  | A    | A    | A    | A     | A                   | A     | A    | A      | A     | A     | A     | A      |
| 6          | 100213515                | 104.6975    | rs4431442  | 0.677              | B                   |                    |      |      |      |       |                     |       | B    |        |       |       |       |        |
| 6          | 100228256                | 104.7098    | rs9403091  | 0.212              | B                   | B                  | B    | B    | B    | B     | B                   | B     | B    | B      | B     | B     | B     | B      |
| 6          | 100231618                | 104.7102    | rs9376435  | 0.447              | B                   |                    |      |      |      |       |                     |       | B    |        |       | B     | B     |        |
| 6          | 100233278                | 104.7105    | rs9385869  | 0.238              |                     |                    |      |      |      |       |                     |       | A    |        |       |       |       |        |
| 6          | 100233870                | 104.7107    | rs9399284  | 0.508              |                     |                    |      |      |      |       |                     |       | A    |        | A     | A     | A     |        |
| 6          | 100236473                | 104.7122    | rs12663112 | 0.823              |                     | A                  | A    | A    | A    | A     | A                   | A     | A    | A      | A     | A     | A     | A      |
| 6          | 100236866                | 104.7124    | rs4596491  | 0.102              |                     | B                  | B    | B    | B    | B     | B                   | B     | B    | B      | B     | B     | B     | B      |
| 6          | 100237464                | 104.7128    | rs12198721 | 0.508              | A                   | A                  | A    | A    | A    | A     | A                   | A     | A    | A      | A     | A     | A     | A      |
| 6          | 100237880                | 104.7135    | rs6936455  | 0.2                | B                   | B                  | B    | B    | B    | B     | B                   | B     | B    | B      | B     | B     | B     | B      |
| 6          | 100240267                | 104.7143    | rs9403103  | 0.235              | B                   | B                  | B    | B    | B    | B     | B                   | B     | B    | B      | B     | B     | B     | B      |
| 6          | 100242158                | 104.7145    | rs6929006  | 0.513              |                     | B                  | B    | B    | B    | B     | B                   | B     | B    | B      | B     | B     | B     | B      |
| 6          | 100242366                | 104.7145    | rs6929428  | 0.336              | B                   | B                  | B    | B    | B    | B     | B                   | B     | B    | B      | B     | B     | B     | B      |
| 6          | 100243033                | 104.7146    | rs17236659 | 0.783              |                     |                    |      | A    |      | A     |                     |       | A    | A      |       | A     | A     | A      |
| 6          | 100243997                | 104.716     | rs9376456  | 0.412              | B                   |                    |      |      |      |       |                     |       | B    |        |       |       |       | B      |
| 6          | 100247048                | 104.7176    | rs6931227  | 0.177              |                     |                    |      |      |      |       |                     |       | A    |        |       |       |       |        |
| 6          | 100249106                | 104.7185    | rs7763983  | 0.735              |                     | B                  | B    |      | B    |       | B                   | B     |      | B      |       |       |       |        |
| 6          | 100250740                | 104.7245    | rs17059858 | 0.211              |                     |                    |      |      |      |       |                     |       | A    |        |       |       |       |        |
| 6          | 100251499                | 104.7264    | rs9484314  | 0.198              |                     |                    |      |      |      |       |                     |       | A    |        |       |       |       |        |
| 6          | 100252886                | 104.7267    | rs17059867 | 0                  | B                   | B                  | B    | B    | B    | B     | B                   | B     | B    | B      | B     | B     | B     | B      |
| 6          | 100255471                | 104.7271    | rs9373250  | 0.27               | B                   | B                  | B    |      | B    |       | B                   | B     | B    | B      | B     | B     | B     | B      |
| 6          | 100257066                | 104.7276    | rs12216503 | 0.111              | B                   |                    |      | B    |      | B     |                     | B     |      | B      |       | B     |       | B      |
| 6          | 100257668                | 104.7279    | rs4495279  | 0.226              |                     | B                  | B    | B    | B    | B     | B                   | B     | B    | B      | B     | B     | B     | B      |
| 6          | 100265121                | 104.7348    | rs6934621  | 0.201              |                     | B                  | B    | B    | B    | B     | B                   | B     | B    | B      | B     | B     | B     | B      |
| 6          | 100266123                | 104.7357    | rs7760502  | 0.665              |                     | A                  | A    | A    | A    | A     | A                   | A     | A    | A      | A     | A     | A     | A      |
| 6          | 100268849                | 104.7382    | rs17059881 | 0.872              |                     | A                  | A    | A    | A    | A     | A                   | A     | A    | A      | A     | A     | A     | A      |
| 6          | 100277840                | 104.7428    | rs13204333 | 0.254              | B                   | B                  |      | B    |      | B     | B                   | B     | B    | B      | B     | B     | B     | B      |
| 6          | 100279956                | 104.7518    | rs9403141  | 0.217              |                     | B                  | B    | B    | B    | B     | B                   | B     | B    | B      | B     | B     | B     | B      |
| 6          | 100280032                | 104.7521    | rs9385894  | 0.278              |                     |                    | B    | B    | B    | B     | B                   | B     | B    | B      | B     | B     | B     | B      |
| 6          | 100281817                | 104.7551    | rs7453413  | 0.403              | A                   | A                  |      | A    |      |       | A                   | A     |      | A      | A     |       |       |        |
| 6          | 100282075                | 104.7553    | rs3922542  | 0.617              | B                   | B                  |      | B    |      |       | B                   | B     |      | B      | B     |       |       |        |
| 6          | 100286127                | 104.7628    | rs9321763  | 0.476              |                     |                    |      | B    |      | B     | B                   | B     |      | B      | B     |       |       | B      |
| 6          | 100288317                | 104.8184    | rs4370372  | 0.637              |                     | A                  |      | A    |      | A     |                     |       | A    |        | A     | A     | A     | A      |
| 6          | 100289337                | 104.8716    | rs9389752  | 0.31               | B                   |                    | B    | B    | B    | B     |                     | B     | B    |        | B     | B     | B     | B      |
| 6          | 100292091                | 104.8879    | rs9495653  | 0.929              | A                   | A                  | A    | A    | A    | A     | A                   | A     | A    | A      | A     | A     | A     | A      |
| 6          | 100293531                | 104.8906    | rs9495657  | 0.317              | A                   |                    |      | A    |      | A     |                     |       |      |        |       |       |       |        |
| 6          | 100296024                | 104.8908    | rs4990843  | 0.628              | B                   |                    |      | B    |      | B     |                     |       |      |        |       |       |       | B      |
| 6          | 100297481                | 104.8909    | rs9403163  | 0.73               | A                   | A                  | A    | A    | A    | A     | A                   | A     | A    | A      | A     | A     | A     | A      |
| 6          | 100317146                | 104.8946    | rs12197810 | 0.73               | A                   |                    |      | A    |      | A     |                     |       | A    |        |       |       |       | A      |
| 6          | 100319031                | 104.8949    | rs9403180  | 0.375              | A                   |                    |      | A    |      | A     |                     |       |      |        |       |       |       | A      |
| 6          | 100321669                | 104.8957    | rs2397663  | 0.992              | A                   | A                  | A    | A    | A    | A     | A                   | A     | A    | A      | A     | A     | A     | A      |
| 6          | 100321734                | 104.8957    | rs2397664  | 0.921              | A                   | A                  | A    | A    | A    | A     | A                   | A     | A    | A      | A     | A     | A     | A      |
| 6          | 100324464                | 104.8958    | rs9403186  | 0.714              | A                   | A                  | A    | A    | A    | A     | A                   | A     | A    | A      | A     | A     | A     | A      |
| 6          | 100326214                | 104.8978    | rs9495745  | 0.219              | B                   |                    |      | B    |      | B     |                     |       | B    |        | B     | B     | B     | B      |
| 6          | 100328198                | 104.9045    | rs4840097  | 0.642              | B                   |                    |      | B    |      | B     |                     |       |      |        |       |       |       | B      |
| 6          | 100329446                | 104.9064    | rs9389810  | 0.721              | A                   |                    |      | A    |      | A     | A                   | A     |      | A      | A     | A     | A     | A      |
| 6          | 100345238                | 104.9096    | rs2397678  | 0.354              | A                   |                    |      | A    |      | A     |                     |       |      |        |       |       |       | A      |
| 6          | 100345403                | 104.9098    | rs6902801  | 0.604              | A                   | A                  | A    | A    | A    | A     |                     |       | A    |        | A     | A     | A     | A      |
| 6          | 100353268                | 104.9202    | rs7751620  | 0.261              | A                   |                    |      | A    |      |       |                     |       |      |        |       |       |       | A      |
| 6          | 100354935                | 104.9231    | rs9403208  | 0.451              | B                   | B                  | B    | B    | B    |       |                     |       | B    |        |       |       |       | B      |
| 6          | 100366635                | 104.9245    | rs4560657  | 0.212              | A                   |                    |      | A    |      |       |                     |       |      |        |       |       |       | A      |
| 6          | 100369284                | 104.9251    | rs13206575 | 0.723              | B                   |                    |      | B    |      |       |                     |       |      |        |       |       |       | B      |
| 6          | 100391872                | 104.9275    | rs4559096  | 0.31               | B                   |                    |      | B    |      | B     | B                   | B     |      | B      | B     | B     | B     | B      |
| 6          | 100392532                | 104.9276    | rs12215494 | 0.308              | B                   |                    |      | B    |      | B     | B                   | B     |      | B      | B     | B     | B     | B      |
| 6          | 100393761                | 104.9277    | rs13195863 | 0.243              | A                   |                    |      | A    |      |       |                     |       |      |        |       |       |       | A      |
| 6          | 100397526                | 104.9282    | rs10499026 | 0.217              | A                   |                    |      | A    |      |       |                     |       |      |        |       |       |       | A      |
| 6          | 100403514                | 104.9289    | rs4840106  | 0.304              | B                   | B                  | B    | B    | B    | B     |                     |       | B    |        | B     | B     | B     | B      |
| 6          | 100411417                | 104.9299    | rs7758072  | 0                  | B                   | B                  | B    | B    | B    | B     | B                   | B     | B    | B      | B     | B     | B     | B      |
| 6          | 100427015                | 104.9418    | rs7739904  | 0.365              | B                   | B                  | B    | B    | B    |       |                     |       | B    |        | B     | B     | B     |        |
| 6          | 100428029                | 104.9567    | rs9496070  | 0.5                |                     |                    |      | B    |      |       |                     |       | B    |        |       |       |       | B      |
| 6          | 100428313                | 104.9588    | rs13212643 | 0.419              |                     | A                  |      |      |      |       |                     |       | A    |        |       |       |       | A      |
| 6          | 100430062                | 104.9612    | rs12203515 | 0.208              |                     | B                  |      | B    |      | B     | B                   | B     |      | B      | B     | B     | B     | B      |
| 6          | 100430803                | 104.9623    | rs9496085  | 0.373              | B                   | B                  | B    | B    |      |       |                     |       | B    |        | B     | B     | B     |        |
| 6          | 100431321                | 104.9629    | rs9389934  | 0.616              | A                   | A                  | A    | A    | A    |       |                     |       | A    |        |       |       |       | A      |
| 6          | 100439009                | 104.9681    | rs2001456  | 0.226              | B                   |                    |      | B    |      | B     | B                   | B     |      | B      | B     | B     | B     | B      |
| 6          | 100442268                | 104.9706    | rs6925272  | 0.602              | B                   |                    |      | B    |      |       |                     |       |      |        |       |       |       | B      |
| 6          | 100442554                | 104.9708    | rs9969034  | 0.009              | B                   | B                  | B    | B    | B    | B     | B                   | B     |      | B      | B     | B     | B     | B      |
| 6          | 100445429                | 104.9741    | rs2397694  | 0.987              | A                   | A                  | A    | A    | A    | A     | A                   | A     | A    | A      | A     | A     | A     | A      |
| 6          | 100446900                | 104.9911    | rs9399386  | 0.185              | B                   |                    |      | B    |      | B     | B                   | B     |      | B      | B     | B     | B     | B      |
| 6          | 100448788                | 105.0153    | rs3763374  | 0.093              | B                   | B                  | B    | B    | B    | B     | B                   | B     |      | B      | B     | B     | B     | B      |
| 6          | 100449301                | 105.022     | rs9385975  | 0.111              | B                   |                    |      | B    |      | B     | B                   | B     |      | B      | B     | B     | B     | B      |
| 6          | 100457411                | 105.025     | rs9389951  | 0.473              | B                   |                    |      |      |      |       |                     |       |      |        |       |       |       | B      |
| 6          | 100469529                | 105.0296    | rs9484578  | 0.95               | A                   | A                  | A    | A    | A    |       |                     |       | A    | A      | A     | A     | A     | A      |
| 6          | 100480906                | 105.0316    | rs4240585  | 0.315              | B                   |                    |      |      |      | B     | B                   | B     |      |        |       |       |       |        |

| Chromosome | Physical position (hg19) | Genetic map | rs number  | Allele A frequency | Family 11 (GC15416) | Family 12 (GC3722) |      |      |      |       | Family 13 (GC17225) |       |      |        |       |       |       |        |
|------------|--------------------------|-------------|------------|--------------------|---------------------|--------------------|------|------|------|-------|---------------------|-------|------|--------|-------|-------|-------|--------|
|            |                          |             |            |                    | III:3               | III:11             | IV:2 | II:7 | IV:6 | IV:13 | IV:57               | IV:58 | II:9 | III:27 | IV:56 | III:6 | IV:13 | III:14 |
| 6          | 100612700                | 105.2132    | rs17789452 | 0.345              | B                   |                    | B    | B    | B    | B     | B                   | B     | B    | B      | B     | B     | B     | B      |
| 6          | 100618009                | 105.2148    | rs6916538  | 0.772              | A                   | A                  |      | A    |      |       |                     |       |      | A      |       |       |       | A      |
| 6          | 100626148                | 105.2171    | rs761711   | 0.465              | A                   |                    |      | A    |      | A     | A                   | A     | A    |        | A     | A     | A     | A      |
| 6          | 100627435                | 105.2176    | rs13205707 | 0.381              | B                   |                    | B    | B    | B    | B     | B                   | B     | B    |        | B     | B     | B     | B      |
| 6          | 100631103                | 105.3208    | rs7741147  | 0.619              | A                   | A                  | A    |      | A    |       | A                   | A     | A    |        | A     | A     | A     |        |
| 6          | 100633338                | 105.3305    | rs12201659 | 0.398              |                     | B                  | B    | B    | B    | B     | B                   | B     |      | B      | B     |       |       | B      |
| 6          | 100634009                | 105.3324    | rs6899958  | 0.193              | B                   |                    | B    | B    | B    |       | B                   | B     | B    | B      | B     | B     | B     | B      |
| 6          | 100636619                | 105.3449    | rs7754315  | 0.429              |                     | A                  | A    |      | A    | A     | A                   | A     |      | A      | A     |       |       | A      |
| 6          | 100642867                | 105.4553    | rs6570574  | 0.221              | B                   | B                  | B    | B    | B    | B     | B                   | B     |      | B      | B     |       |       | B      |
| 6          | 100650387                | 105.4555    | rs9496769  | 0.246              |                     |                    |      |      |      | B     |                     |       | B    | B      | B     |       |       | B      |
| 6          | 100661336                | 105.4569    | rs9484823  | 0.854              | A                   |                    |      |      |      | A     |                     |       | A    | A      |       |       |       | A      |
| 6          | 100661466                | 105.457     | rs9399465  | 0.04               | B                   | B                  | B    | B    | B    | B     | B                   | B     | B    | B      | B     | B     | B     | B      |
| 6          | 100668277                | 105.46      | rs9390146  | 0.097              |                     | B                  | B    | B    | B    | B     | B                   | B     |      | B      | B     | B     | B     | B      |
| 6          | 100674018                | 105.463     | rs6928245  | 0.332              |                     | B                  | B    | B    | B    | B     | B                   | B     |      | B      | B     | B     | B     |        |
| 6          | 100674799                | 105.4634    | rs7749433  | 0.761              | A                   | A                  | A    | A    | A    | A     | A                   | A     | A    | A      | A     | A     | A     |        |
| 6          | 100676593                | 105.4642    | rs730223   | 0.584              |                     |                    |      |      |      |       |                     |       | A    | A      | A     | A     |       |        |
| 6          | 100680565                | 105.4679    | rs2073265  | 0.384              | B                   |                    |      |      |      | B     |                     |       | B    | B      |       |       |       | B      |
| 6          | 100693008                | 105.4694    | rs4140483  | 0.133              | B                   |                    |      |      |      | B     |                     |       | B    | B      |       |       |       | B      |
| 6          | 100698564                | 105.4701    | rs9390162  | 0.827              | A                   |                    |      |      |      | A     |                     |       | A    | A      |       |       |       | A      |
| 6          | 100706809                | 105.471     | rs12175103 | 0.406              | B                   |                    |      |      |      | B     |                     |       | B    | B      |       |       |       | B      |
| 6          | 100707145                | 105.4711    | rs6908458  | 0.754              | A                   | A                  | A    | A    | A    | A     | A                   | A     | A    | A      | A     | A     | A     |        |
| 6          | 100722593                | 105.4729    | rs7750764  | 0.092              | B                   | B                  | B    | B    | B    | B     | B                   | B     | B    | B      | B     | B     | B     | B      |
| 6          | 100734930                | 105.4735    | rs9399482  | 0.404              | B                   |                    |      |      |      | B     |                     |       | B    | B      |       |       |       | B      |
| 6          | 100743929                | 105.4776    | rs9376845  | 0.057              | B                   | B                  | B    | B    | B    | B     | B                   | B     | B    | B      | B     | B     | B     | B      |
| 6          | 100744281                | 105.4776    | rs10499030 | 0.261              | B                   | B                  | B    | B    | B    | B     | B                   | B     | B    | B      | B     | B     | B     | B      |
| 6          | 100752002                | 105.4776    | rs9390223  | 0.757              | A                   | A                  | A    | A    | A    | A     | A                   | A     | A    | A      | A     | A     | A     |        |
| 6          | 100758142                | 105.4841    | rs11752981 | 0.808              | A                   | A                  | A    | A    | A    | A     | A                   | A     | A    | A      | A     | A     | A     |        |
| 6          | 100760042                | 105.5016    | rs9376867  | 0.288              | B                   | B                  | B    | B    | B    | B     | B                   | B     | B    | B      | B     | B     | B     | B      |
| 6          | 100760170                | 105.5033    | rs13196561 | 0.204              | B                   | B                  | B    | B    | B    | B     | B                   | B     | B    | B      | B     | B     | B     | B      |
| 6          | 100760409                | 105.5064    | rs3957418  | 0.376              | A                   |                    |      |      |      |       |                     | A     |      |        |       |       |       | A      |
| 6          | 100763213                | 105.5223    | rs924974   | 0.35               | B                   | B                  | B    | B    | B    | B     | B                   | B     | B    | B      | B     | B     | B     |        |
| 6          | 100769678                | 105.5227    | rs10046239 | 0.912              | A                   | A                  | A    | A    | A    | A     | A                   | A     | A    | A      | A     | A     | A     | A      |
| 6          | 100773433                | 105.5231    | rs1506075  | 0.903              | A                   |                    |      |      |      | A     |                     |       | A    | A      | A     | A     | A     | A      |
| 6          | 100776957                | 105.5235    | rs2658132  | 0.008              | B                   | B                  | B    | B    | B    | B     | B                   | B     | B    | B      | B     | B     | B     | B      |
| 6          | 100779276                | 105.524     | rs2841300  | 0.357              | B                   | B                  | B    | B    | B    | B     | B                   | B     | B    | B      | B     | B     | B     | B      |
| 6          | 100779692                | 105.5244    | rs9390276  | 0.933              | A                   | A                  | A    | A    | A    | A     | A                   | A     | A    | A      | A     | A     | A     | A      |
| 6          | 100781576                | 105.5246    | rs2658128  | 0                  | B                   | B                  | B    | B    | B    | B     | B                   | B     | B    | B      | B     | B     | B     | B      |
| 6          | 100785588                | 105.5251    | rs2841296  | 0.867              | A                   | A                  | A    | A    | A    | A     | A                   | A     | A    | A      | A     | A     | A     | A      |
| 6          | 100791267                | 105.5261    | rs1395118  | 0.783              | A                   | A                  | A    | A    | A    | A     | A                   | A     | A    | A      | A     | A     | A     |        |
| 6          | 100793016                | 105.5274    | rs7749859  | 0.044              | B                   | B                  | B    | B    | B    | B     | B                   | B     | B    | B      | B     | B     | B     | B      |
| 6          | 100793443                | 105.5277    | rs2841292  | 0.686              | A                   | A                  | A    | A    | A    | A     | A                   | A     | A    | A      | A     | A     | A     | A      |
| 6          | 100797890                | 105.534     | rs1876155  | 0.159              | B                   | B                  |      | B    |      | B     | B                   | B     | B    | B      | B     | B     | B     | B      |
| 6          | 100798472                | 105.5356    | rs1506079  | 0.111              |                     |                    | B    |      |      | B     |                     |       | B    | B      |       |       |       | B      |
| 6          | 100800122                | 105.5371    | rs2841287  | 0.273              |                     |                    |      |      |      | B     |                     |       | B    | B      |       |       |       | B      |
| 6          | 100802068                | 105.5379    | rs9403683  | 0.863              | A                   | A                  | A    | A    | A    | A     | A                   | A     | A    | A      | A     | A     | A     | A      |
| 6          | 100810976                | 105.543     | rs9403695  | 0.074              | B                   | B                  | B    | B    | B    | B     | B                   | B     | B    | B      | B     | B     | B     | B      |
| 6          | 100811392                | 105.5528    | rs17060420 | 0.916              | A                   | A                  | A    | A    | A    | A     | A                   | A     | A    | A      | A     | A     | A     | A      |
| 6          | 100811533                | 105.5562    | rs17792983 | 0.252              | B                   | B                  | B    | B    | B    | B     | B                   | B     | B    | B      | B     | B     | B     |        |
| 6          | 100813188                | 105.5838    | rs1506084  | 0.35               |                     | B                  |      |      |      | B     |                     |       | B    | B      |       |       |       | B      |
| 6          | 100816614                | 105.5848    | rs13213077 | 0.231              |                     | B                  |      |      |      | B     |                     |       | B    | B      |       |       |       | B      |
| 6          | 100818915                | 105.5855    | rs9376940  | 0.252              |                     | B                  |      |      |      | B     |                     |       | B    | B      |       |       |       | B      |
| 6          | 100827450                | 105.5904    | rs9403718  | 0.761              |                     | A                  |      |      |      | A     |                     |       | A    | A      |       |       |       | A      |
| 6          | 100827834                | 105.5905    | rs17060460 | 0.759              |                     | A                  |      |      |      | A     |                     |       | A    | A      |       |       |       | A      |
| 6          | 100829135                | 105.5906    | rs453530   | 0.036              | B                   | B                  | B    | B    | B    | B     | B                   | B     | B    | B      | B     | B     | B     | B      |
| 6          | 100831997                | 105.5907    | rs9403732  | 0.146              |                     | B                  |      |      |      | B     |                     |       | B    | B      |       |       |       | B      |
| 6          | 100836784                | 105.591     | rs13201004 | 0.106              | B                   | B                  | B    | B    | B    | B     | B                   | B     | B    | B      | B     | B     | B     | B      |
| 6          | 100857869                | 105.5953    | rs7747189  | 0.248              |                     | B                  |      |      |      | B     |                     |       | B    | B      |       |       |       | B      |
| 6          | 100859159                | 105.5956    | rs718268   | 0.754              |                     | A                  |      |      |      | A     |                     |       | A    | A      |       |       |       | A      |
| 6          | 100859947                | 105.5958    | rs17060530 | 0.685              |                     | A                  |      |      |      | A     |                     |       | A    | A      |       |       |       | A      |
| 6          | 100862051                | 105.5964    | rs17060534 | 0.093              | B                   | B                  | B    | B    | B    | B     | B                   | B     | B    | B      | B     | B     | B     | B      |
| 6          | 100868779                | 105.5986    | rs3734354  | 0.146              | B                   | B                  |      |      |      | B     |                     |       | B    | B      |       |       |       | B      |
| 6          | 100872787                | 105.6067    | rs714378   | 0.204              | B                   | B                  | B    | B    | B    | B     | B                   | B     | B    | B      | B     | B     | B     | B      |
| 6          | 100875516                | 105.631     | rs3778033  | 0.783              |                     | A                  |      |      |      | A     |                     |       | A    |        |       |       |       | A      |
| 6          | 100878267                | 105.7577    | rs3798498  | 0.549              | A                   | A                  | A    | A    | A    | A     | A                   | A     | A    | A      | A     | A     | A     |        |
| 6          | 100879651                | 105.7594    | rs241816   | 0.584              | A                   | A                  | A    | A    | A    | A     | A                   | A     | A    | A      | A     | A     | A     |        |
| 6          | 100880696                | 105.7602    | rs1847912  | 0.712              | A                   | A                  | A    | A    | A    | A     | A                   | A     | A    | A      | A     | A     | A     |        |
| 6          | 100888625                | 105.7632    | rs3798492  | 0.319              | B                   | B                  | B    | B    | B    | B     | B                   | B     | B    | B      | B     | B     | B     | B      |
| 6          | 100894587                | 105.7639    | rs1857859  | 0.321              | B                   | B                  | B    | B    | B    | B     | B                   | B     | B    | B      | B     | B     | B     | B      |
| 6          | 100895344                | 105.7639    | rs397662   | 0.836              | A                   | A                  | A    | A    | A    | A     | A                   | A     | A    | A      | A     | A     | A     | A      |
| 6          | 100897259                | 105.7644    | rs438766   | 0.009              | B                   | B                  | B    | B    | B    | B     | B                   | B     | B    | B      | B     | B     | B     | B      |
| 6          | 100906504                | 105.7667    | rs3798485  | 0                  | B                   | B                  | B    | B    | B    | B     | B                   | B     | B    | B      | B     | B     | B     | B      |
| 6          | 100910798                | 105.7681    | rs241819   | 0.496              | A                   | A                  | A    | A    | A    | A     | A                   | A     | A    | A      | A     | A     | A     | A      |
| 6          | 100913553                | 105.7683    | rs6928357  | 0.025              | B                   | B                  | B    | B    | B    | B     | B                   | B     | B    | B      | B     | B     | B     | B      |
| 6          | 100932409                | 105.7743    | rs1972281  | 0.758              | A                   | A                  | A    | A    | A    | A     | A                   | A     | A    | A      | A     | A     | A     | A      |
| 6          | 100936361                | 105.7746    | rs6570772  | 0.173              | B                   | B                  | B    | B    | B    | B     | B                   | B     | B    | B      | B     | B     | B     | B      |
| 6          | 100936628                | 105.7746    | rs10457800 | 0.465              | A                   | A                  | A    | A    | A    | A     | A                   | A     | A    | A      | A     | A     | A     |        |
| 6          | 100942138                | 105.7766    | rs7764271  | 0.023              | B                   | B                  | B    | B    | B    | B     | B                   | B     | B    | B      | B     | B     | B     | B      |
| 6          | 100949822                | 105.7771    | rs7751526  | 0.496              | B                   | B                  | B    | B    | B    | B     | B                   | B     | B    | B      | B     | B     | B     |        |
| 6          | 100953148                | 105.7805    | rs240764   | 0.403              | A                   | A                  | A    | A    | A    | A     | A                   | A     | A    | A      | A     | A     | A     |        |
| 6          | 100954036                | 105.7828    | rs240766   | 0.478              | A                   | A                  | A    | A    | A    | A     | A                   | A     | A    | A      | A     | A     | A     |        |
| 6          | 100955752                | 105.7846    | rs12374612 | 0.389              | A                   | A                  | A    | A    | A    | A     | A                   | A     | A    | A      | A     | A     | A     |        |
| 6          | 100957344                | 105.7848    | rs240768   | 0.938              | A                   | A                  | A    | A    | A    | A     | A                   | A     | A    | A      | A     | A     | A     | A      |
| 6          | 100961198                | 105.7853    | rs401864   | 0.92               | A                   | A                  | A    | A    | A    | A     | A                   | A     | A    | A      | A     | A     | A     | A      |
| 6          | 100966006                | 105.7859    | rs3213542  | 0.072              | B                   | B                  | B    | B    | B    | B     | B                   | B     | B    | B      | B     | B     | B     | B      |
| 6          | 100999211                | 105.7861    | rs17060716 | 0                  | B                   | B                  | B    | B    | B    | B     | B                   | B     | B    | B      | B     | B     | B     | B      |
| 6          | 101027440                | 105.7878    | rs6931919  | 0.944              | A                   | A                  | A    | A    | A    | A     | A                   | A     | A    | A      | A     | A     | A     | A      |
| 6          | 101039215                | 105.7879    | rs17245314 | 0.707              | A                   | A                  | A    | A    | A    | A     | A                   | A     | A    | A      | A     | A     | A     |        |
| 6          | 101039685                | 105.7879    | rs7741503  | 0.004              | B                   | B                  | B    | B    | B    | B     | B                   | B     | B    | B      | B     | B     | B     | B      |
| 6          | 101049108                | 105.7889    | rs6927531  | 0.023              | B                   | B                  | B    | B    | B    | B     | B                   | B     | B    | B      | B     | B     | B     | B      |
| 6          | 101072307                | 105.7902    | rs240150   | 0.577              | B                   | B                  | B    | B    | B    | B     | B                   | B     | B    | B      | B     | B     | B     |        |
| 6          | 101076992                | 105.7904    | rs17246013 | 0.992              | A                   | A                  | A    | A    | A    | A     | A                   | A     | A    | A      | A     | A     | A     | A      |
| 6          | 101091434                | 105.7912    | rs1392969  | 0.973              | A                   | A                  | A    | A    | A    | A     | A                   | A     | A    | A      | A     | A     | A     | A      |
| 6          | 101094554                | 105.7913    | rs239239   | 0.398              | A                   | A                  | A    | A    | A    | A     | A                   | A     | A    | A      | A     | A     | A     |        |
| 6          | 101109175                | 105.7918    | rs17306522 | 0.111              | A                   |                    |      |      |      | A     |                     |       | A    |        |       |       |       |        |
| 6          | 101147095                | 105.7977    | rs12201157 | 0.089              |                     |                    |      |      |      |       |                     |       |      |        |       |       |       |        |



**Supplementary Table S2** Region with a Conserved Homozygosity Haplotype<sup>2</sup> (HH) at the MCDR3 locus shared by 14 affected individuals from families 2-7 with available Illumina SNP array data. The HH is a type of haplotype described by the homozygous SNPs only (all heterozygous SNPs are removed) and, therefore, can be uniquely determined on each chromosome. Genotypes are displayed vertically per each individual (A=AA, B=BB, blank cells=AB). The start and end of the shared HH are marked with a red bold line.

| Chromosome | Physical position (hg19) | Genetic map | rs number  | Allele A frequency | Family 2 (GC15626) |      | Family 3 (GC15119) |       |       |     | Family 4 (GC13840) |     |      | Family 5 (GC19075) |      |      | Family 6 (GC15475) | Family 7 (GC11709) |
|------------|--------------------------|-------------|------------|--------------------|--------------------|------|--------------------|-------|-------|-----|--------------------|-----|------|--------------------|------|------|--------------------|--------------------|
|            |                          |             |            |                    | IV:5               | IV:6 | IV:III             | IV:II | III:1 | V:1 | II:1               | I:1 | II:2 | III:4              | II:3 | II:2 | I:1                | II:1               |
| 5          | 4293345                  | 10.7122     | rs11742174 | 0.845              | A                  | A    | A                  | A     | A     | A   | A                  | A   | A    | A                  | A    | A    | A                  | A                  |
| 5          | 4293859                  | 10.7127     | rs7702429  | 0.088              | B                  | B    | B                  | B     | B     | B   | B                  | B   | B    | B                  | B    | B    | B                  | B                  |
| 5          | 4297423                  | 10.7163     | rs7731506  | 0.217              | B                  | B    | B                  | B     | B     | B   | B                  | B   | B    | B                  | B    | B    | B                  | B                  |
| 5          | 4303898                  | 10.7173     | rs1393106  | 0.385              | B                  | B    | B                  | B     | B     | B   | B                  | B   | B    | B                  | B    | B    | B                  | B                  |
| 5          | 4305161                  | 10.7175     | rs11134044 | 0.845              | A                  | A    | A                  | A     | A     | A   | A                  | A   | A    | A                  | A    | A    | A                  | A                  |
| 5          | 4311402                  | 10.7206     | rs155350   | 0.177              |                    |      | B                  | B     | B     | B   |                    | B   |      | A                  | A    |      | B                  | B                  |
| 5          | 4316307                  | 10.7218     | rs261133   | 0.235              | B                  | B    | B                  | B     | B     | B   | B                  | B   | B    | B                  | B    | B    | B                  | B                  |
| 5          | 4316470                  | 10.7218     | rs11749633 | 0.15               | B                  | B    | B                  | B     | B     | B   | B                  | B   | B    | B                  | B    | B    | B                  | B                  |
| 5          | 4321335                  | 10.722      | rs155279   | 0.368              |                    | B    |                    |       |       | A   |                    | A   |      | B                  | B    |      | A                  | A                  |
| 5          | 4325295                  | 10.7221     | rs155353   | 0.268              |                    |      |                    |       | B     | B   |                    | B   |      | A                  | A    |      | B                  | B                  |
| 5          | 4327455                  | 10.7221     | rs155354   | 0.131              | B                  | B    | B                  | B     | B     | B   |                    | B   |      | B                  |      |      | B                  | B                  |
| 5          | 4336158                  | 10.7248     | rs16873316 | 0.013              | B                  | B    | B                  | B     | B     | B   | B                  | B   | B    | B                  | B    | B    | B                  | B                  |
| 5          | 4341114                  | 10.7249     | rs10069119 | 0.102              | B                  | B    | B                  | B     | B     | B   | B                  | B   | B    | B                  | B    | B    | B                  | B                  |
| 5          | 4346529                  | 10.7258     | rs155356   | 0.854              | A                  |      | A                  | A     | A     | A   | A                  | A   | A    | A                  | A    | A    | A                  | A                  |
| 5          | 4355708                  | 10.7268     | rs17727202 | 0.915              | A                  | A    | A                  | A     | A     | A   | A                  | A   | A    | A                  | A    | A    | A                  | A                  |
| 5          | 4356792                  | 10.727      | rs261144   | 0.64               | A                  |      | A                  | A     |       | A   | A                  | A   | A    | A                  | A    | A    | A                  | A                  |
| 5          | 4362756                  | 10.7288     | rs13185799 | 0.097              | B                  | B    | B                  | B     | B     |     | B                  | B   | B    | B                  | B    | B    | B                  | B                  |
| 5          | 4368462                  | 10.7301     | rs261124   | 0.248              | B                  |      |                    |       | B     | B   | B                  | B   | B    | B                  | B    | B    | B                  | B                  |
| 5          | 4369887                  | 10.7307     | rs261125   | 0.522              | A                  |      |                    |       |       | A   | A                  | A   | A    | A                  | A    | A    | A                  | A                  |
| 5          | 4372548                  | 10.7321     | rs1354129  | 0.759              | A                  | A    | A                  | A     |       | A   | A                  | A   | A    | A                  | A    | A    | A                  | A                  |
| 5          | 4375021                  | 10.7334     | rs9313075  | 0.128              | B                  | B    | B                  | B     | B     | A   | B                  | B   | B    | B                  | B    | B    | B                  | B                  |
| 5          | 4375160                  | 10.7341     | rs261126   | 0.296              |                    | B    |                    | B     |       |     | B                  |     | B    |                    | B    |      | B                  |                    |
| 5          | 4375574                  | 10.7429     | rs261128   | 0.305              | B                  |      |                    |       | B     | B   | B                  | B   | B    | B                  | B    | B    | B                  | B                  |
| 5          | 4375862                  | 10.7508     | rs13175033 | 0.597              |                    | A    | A                  | A     | A     |     |                    | A   |      | A                  |      |      |                    | A                  |
| 5          | 4376022                  | 10.7545     | rs261129   | 0.58               | B                  |      |                    |       |       | B   |                    | B   |      | B                  |      |      |                    |                    |
| 5          | 4376717                  | 10.756      | rs261130   | 0.854              | A                  | A    | A                  | A     | A     | A   | A                  | A   | A    | A                  | A    | A    | A                  | A                  |
| 5          | 4380545                  | 10.7636     | rs12187807 | 0.111              |                    | B    | B                  | B     | B     |     | B                  | B   | B    | B                  | B    | B    | B                  | B                  |
| 5          | 4380725                  | 10.7648     | rs4701855  | 0.743              | B                  |      |                    |       |       | B   |                    |     |      |                    |      |      |                    |                    |
| 5          | 4381727                  | 10.7652     | rs10073943 | 1                  | A                  | A    | A                  | A     | A     | A   | A                  | A   | A    | A                  | A    | A    | A                  | A                  |
| 5          | 4388200                  | 10.7681     | rs10052590 | 0                  | B                  | B    | B                  | B     | B     | B   | B                  | B   | B    | B                  | B    | B    | B                  | B                  |
| 5          | 4389744                  | 10.7687     | rs11948367 | 1                  | A                  | A    | A                  | A     | A     | A   | A                  | A   | A    | A                  | A    | A    | A                  | A                  |
| 5          | 4390768                  | 10.7692     | rs1080648  | 0.646              | B                  |      |                    |       |       | B   |                    |     |      |                    |      |      |                    |                    |
| 5          | 4391653                  | 10.7695     | rs12716158 | 0.761              | B                  |      |                    |       |       | B   |                    |     |      |                    |      |      |                    |                    |
| 5          | 4396901                  | 10.7739     | rs13168384 | 0.231              |                    | B    | B                  | B     | B     |     | B                  | B   | B    | B                  | B    | B    | B                  | B                  |
| 5          | 4397173                  | 10.7807     | rs9313076  | 0                  | B                  | B    | B                  | B     | B     | B   | B                  | B   | B    | B                  | B    | B    | B                  | B                  |
| 5          | 4397964                  | 10.8214     | rs9313078  | 0.138              | B                  | B    |                    |       |       | B   | B                  | B   | B    | B                  | B    | B    | B                  | B                  |
| 5          | 4399737                  | 10.9523     | rs17677148 | 0.332              |                    |      |                    |       |       |     |                    |     |      |                    |      |      |                    |                    |
| 5          | 4405918                  | 11.0716     | rs7718259  | 0.929              | A                  |      | A                  | A     | A     | A   | A                  | A   | A    | A                  | A    | A    | A                  | A                  |
| 5          | 4407484                  | 11.0765     | rs4702677  | 0.646              |                    |      | A                  |       |       | A   |                    |     | A    | A                  | A    | A    | A                  | A                  |
| 5          | 4409168                  | 11.0843     | rs4701864  | 0.155              | B                  | B    | B                  | B     | B     | B   | B                  | B   | B    | B                  | B    | B    | B                  | B                  |
| 5          | 4417155                  | 11.0925     | rs10061612 | 1                  | A                  | A    | A                  | A     | A     | A   | A                  | A   | A    | A                  | A    | A    | A                  | A                  |
| 5          | 4417450                  | 11.0926     | rs12518914 | 0.801              | A                  | A    | A                  |       |       | A   | A                  | A   | A    | A                  | A    | A    |                    | A                  |
| 5          | 4419552                  | 11.0934     | rs10044501 | 0.947              | A                  | A    | A                  | A     |       | A   | A                  | A   | A    | A                  | A    | A    |                    |                    |
| 5          | 4420716                  | 11.0948     | rs13186177 | 0.274              |                    |      |                    |       |       |     |                    |     |      |                    |      |      |                    |                    |
| 5          | 4423292                  | 11.0962     | rs10078927 | 0.058              | B                  | B    | B                  | B     | B     | B   | B                  | B   | B    | B                  | B    | B    | B                  | B                  |
| 5          | 4426699                  | 11.0967     | rs10076204 | 0.478              |                    |      |                    |       |       |     |                    |     |      |                    |      |      |                    |                    |
| 5          | 4428580                  | 11.097      | rs11134052 | 0.221              |                    |      |                    |       |       |     |                    |     |      |                    |      |      |                    |                    |
| 5          | 4429187                  | 11.0972     | rs10054113 | 0.947              | A                  | A    | A                  | A     | A     | A   | A                  | A   | A    | A                  | A    | A    | A                  | A                  |
| 5          | 4436013                  | 11.0991     | rs4286636  | 0.947              | A                  | A    | A                  | A     | A     | A   | A                  | A   | A    | A                  | A    | A    | A                  | A                  |
| 5          | 4438356                  | 11.103      | rs6894740  | 0.929              | A                  | A    | A                  | A     | A     | A   | A                  | A   | A    | A                  | A    | A    | A                  | A                  |
| 5          | 4439260                  | 11.1051     | rs10064177 | 0.628              | A                  | A    | A                  | A     | A     | A   | A                  | A   | A    | A                  | A    | A    | A                  | A                  |
| 5          | 4439651                  | 11.1199     | rs6861699  | 0.735              | B                  | B    |                    |       |       | B   |                    | B   |      |                    |      |      |                    | B                  |
| 5          | 4439786                  | 11.125      | rs6887047  | 0.739              | A                  |      |                    |       |       | A   | A                  | A   | A    | A                  |      |      |                    | A                  |
| 5          | 4440130                  | 11.138      | rs6887571  | 0.549              |                    | A    |                    |       |       | A   | A                  | A   | A    | A                  |      |      | A                  |                    |
| 5          | 4442390                  | 11.2175     | rs2043354  | 0.004              | B                  | B    | B                  | B     | B     | B   | B                  | B   | B    | B                  | B    | B    | B                  | B                  |
| 5          | 4455368                  | 11.2594     | rs4701877  | 0.73               | A                  | A    | A                  | A     | A     | A   | A                  | A   | A    | A                  | A    | A    | A                  | A                  |
| 5          | 4456379                  | 11.2595     | rs17276015 | 0                  | B                  | B    | B                  | B     | B     | B   | B                  | B   | B    | B                  | B    | B    | B                  | B                  |
| 5          | 4456841                  | 11.2595     | rs1433271  | 0.996              | A                  | A    | A                  | A     | A     | A   | A                  | A   | A    | A                  | A    | A    | A                  | A                  |
| 5          | 4467380                  | 11.2603     | rs4701884  | 0                  | B                  | B    | B                  | B     | B     | B   | B                  | B   | B    | B                  | B    | B    | B                  | B                  |
| 5          | 4474329                  | 11.2689     | rs9313082  | 0.305              |                    | A    |                    |       |       |     |                    |     |      | A                  |      |      | A                  |                    |
| 5          | 4474589                  | 11.2696     | rs1433265  | 0.71               | A                  | A    |                    |       |       | A   | A                  |     |      | A                  |      |      | A                  |                    |
| 5          | 4478547                  | 11.2713     | rs10066908 | 0.655              |                    |      |                    |       |       |     |                    |     |      | B                  |      |      | B                  |                    |
| 5          | 4488309                  | 11.2732     | rs10462795 | 0.792              | A                  | A    | A                  | A     | A     | A   | A                  | A   | A    | A                  | A    | A    | A                  | A                  |
| 5          | 4491526                  | 11.2745     | rs10036724 | 1                  | A                  | A    | A                  | A     | A     | A   | A                  | A   | A    | A                  | A    | A    | A                  | A                  |
| 5          | 4493944                  | 11.2748     | rs12516470 | 0.77               | A                  | A    |                    |       |       | A   | A                  | A   | A    | A                  |      |      | A                  |                    |
| 5          | 4510920                  | 11.2768     | rs16873498 | 0                  | B                  | B    | B                  | B     | B     | B   | B                  | B   | B    | B                  | B    | B    | B                  | B                  |
| 5          | 4511087                  | 11.2769     | rs1450827  | 0.181              | B                  | B    | B                  | B     | B     | B   | B                  | B   | B    | B                  | B    | B    | B                  | B                  |
| 5          | 4512711                  | 11.2826     | rs921393   | 0                  | B                  | B    | B                  | B     | B     | B   | B                  | B   | B    | B                  | B    | B    | B                  | B                  |
| 5          | 4514532                  | 11.3006     | rs16873509 | 0.162              | B                  | B    | B                  | B     | B     | B   | B                  | B   | B    | B                  | B    | B    | B                  | B                  |
| 5          | 4515447                  | 11.3034     | rs6881826  | 0.802              | A                  | A    |                    |       |       | A   | A                  | A   | A    | A                  |      |      | A                  |                    |
| 5          | 4515553                  | 11.3037     | rs921392   | 0.946              | A                  | A    |                    |       |       | A   | A                  | A   | A    | A                  |      |      | A                  |                    |
| 5          | 4516670                  | 11.3057     | rs11134055 | 0.681              | A                  |      | A                  | A     | A     | A   | A                  | A   | A    | A                  |      | A    | A                  |                    |
| 5          | 4517509                  | 11.3072     | rs13187596 | 0.679              | A                  |      | A                  | A     | A     | A   | A                  | A   | A    | A                  |      | A    | A                  |                    |
| 5          | 4520220                  | 11.3399     | rs12517115 | 0.177              | B                  | B    | B                  | B     | B     | B   | B                  | B   | B    | B                  | B    | B    | B                  | B                  |
| 5          | 4520856                  | 11.3481     | rs1450822  | 0.509              |                    |      | B                  |       |       |     | B                  |     | B    |                    |      |      | B                  | B                  |
| 5          | 4532227                  | 11.354      | rs17690482 | 0.212              | B                  | B    | B                  | B     | B     | B   | B                  | B   | B    | B                  | B    | B    | B                  | B                  |
| 5          | 4534191                  | 11.3553     | rs6555299  | 0.261              | B                  | B    | B                  | B     | B     | B   | B                  | B   | B    | B                  | B    | B    | B                  | B                  |
| 5          | 4542749                  | 11.3743     | rs3943533  | 0.735              | A                  | A    | A                  | A     | A     | A   | A                  | A   | A    | A                  | A    | A    | A                  | A                  |
| 5          | 4547644                  | 11.3882     | rs10070988 | 0                  | B                  | B    | B                  | B     | B     | B   | B                  | B   | B    | B                  | B    | B    | B                  | B                  |
| 5          | 4547704                  | 11.3882     | rs10064215 | 0.294              | B                  | B    |                    |       |       | B   | B                  | B   | B    | B                  | B    | B    | B                  | B                  |
| 5          | 4565002                  | 11.3949     | rs10474781 | 0                  |                    |      | B                  | B     | B     | B   | B                  | B   | B    | B                  | B    | B    | B                  | B                  |
| 5          | 4568974                  | 11.3956     | rs12515499 | 0.712              | A                  | A    |                    |       |       | A   | A                  | A   | A    | A                  | A    | A    | A                  | A                  |
| 5          | 4574945                  | 11.4474     | rs1030490  | 0.954              | A                  |      | A                  | A     | A     | A   | A                  | A   | A    | A                  | A    | A    | A                  | A                  |
| 5          | 4576516                  | 11.4699     | rs7700360  | 0.208              |                    | B    |                    |       |       |     | B                  |     |      |                    |      |      | B                  |                    |
| 5          | 4577399                  | 11.4763     | rs2052887  | 0.308              | B                  |      | B                  |       |       |     | B                  |     |      |                    |      |      | B                  |                    |
| 5          | 4577842                  | 11.477      | rs12657445 | 0.377              | B                  | B    |                    |       |       | B   |                    |     |      |                    |      |      | B                  |                    |
| 5          | 4578875                  | 11.4786     | rs16873639 | 0.761              | A                  | A    | A                  | A     | A     |     |                    |     |      | A                  | A    | A    | A                  |                    |
| 5          | 4593655                  | 11.5929     | rs10063610 | 0                  | B                  | B    | B                  | B     | B     | B   | B                  | B   | B    | B                  | B    | B    | B                  | B                  |
| 5          | 4599400                  | 11.5951     | rs293067   | 0.283              |                    |      | B                  | B     | B     |     | B                  |     |      | B                  | B    | B    | B                  | B                  |
| 5          | 4600961                  | 11.5956     | rs7730075  | 0.796              |                    |      | A                  | A     |       |     | A                  | A   | A    | A                  | A    | A    | A                  |                    |
| 5          | 4601882                  | 11.596      | rs7710837  | 0.005              | B                  | B    | B                  | B     | B     | B   | B                  | B   | B    | B                  | B    | B    | B                  | B                  |
| 5          | 4605931                  | 11.5976     | rs6894400  | 1                  | A                  | A    | A                  | A     | A     | A   | A                  | A   | A    | A                  | A    | A    | A                  | A                  |
| 5          | 4610206                  | 11.5997     | rs16873676 | 0.008              | B                  | B    | B                  | B     | B     | B   | B                  | B   | B    | B                  | B    | B    | B                  | B                  |
| 5          | 4629210                  | 11.6294     | rs6887582  | 0.293              |                    | A    |                    |       |       | A   | A                  |     |      |                    |      |      |                    |                    |
| 5          | 4632694                  | 11.7446     | rs293102   | 0.35               | B                  | B    | B                  | B     | B     |     | B                  | B   | B    | B                  | B    | B    | B                  | B                  |
| 5          | 4633275                  | 11.7711     | rs293105   | 0.487              |                    |      | B                  |       | </    |     |                    |     |      |                    |      |      |                    |                    |

| Chromosome | Physical position (hg19) | Genetic map | rs number  | Allele A frequency | Family 2 (GC15626) |      | Family 3 (GC15119) |       |       |     | Family 4 (GC13840) |     |      | Family 5 (GC19075) |      |      | Family 6 (GC15475) | Family 7 (GC11709) |
|------------|--------------------------|-------------|------------|--------------------|--------------------|------|--------------------|-------|-------|-----|--------------------|-----|------|--------------------|------|------|--------------------|--------------------|
|            |                          |             |            |                    | IV:5               | IV:6 | IV:III             | IV:II | III:1 | V:1 | II:1               | I:1 | II:2 | III:4              | II:3 | II:2 | I:1                | II:1               |
| 5          | 4657375                  | 11.8314     | rs1366643  | 0.92               | A                  | A    |                    |       | A     | A   | A                  | A   | A    | A                  | A    | A    | A                  |                    |
| 5          | 4657945                  | 11.8319     | rs1346575  | 0.252              | B                  | B    |                    |       | B     | B   | B                  | B   | B    | B                  | B    | B    | B                  |                    |
| 5          | 4659940                  | 11.8345     | rs3928432  | 0.73               | A                  | A    |                    |       | A     | A   | A                  | A   | A    | A                  | A    | A    | A                  |                    |
| 5          | 4660902                  | 11.8359     | rs2115525  | 0.513              |                    |      | A                  |       | A     | A   | A                  | A   | A    | A                  | A    | A    | A                  |                    |
| 5          | 4662323                  | 11.8373     | rs7447371  | 0.987              | A                  | A    | A                  | A     | A     | A   | A                  | A   | A    | A                  | A    | A    | A                  |                    |
| 5          | 4663347                  | 11.8414     | rs4702895  | 0.08               | B                  | B    | B                  | B     | B     | B   | B                  | B   | B    | B                  | B    | B    | B                  |                    |
| 5          | 4664704                  | 11.8426     | rs2162995  | 0.125              | B                  | B    | B                  | B     | B     | B   | B                  | B   | B    | B                  | B    | B    | B                  |                    |
| 5          | 4664870                  | 11.8427     | rs11744458 | 0.097              | B                  | B    |                    |       | B     | B   | B                  | B   | B    | B                  | B    | B    | B                  |                    |
| 5          | 4665354                  | 11.8432     | rs16873806 | 0.031              | B                  | B    | B                  | B     | B     | B   | B                  | B   | B    | B                  | B    | B    | B                  |                    |
| 5          | 4665670                  | 11.8437     | rs4370242  | 0.527              |                    |      | A                  |       | A     | A   | A                  | A   | A    | A                  | A    | A    | A                  |                    |
| 5          | 4665724                  | 11.8438     | rs2895497  | 0.424              |                    |      |                    |       | A     | A   | A                  | A   | A    | A                  | A    | A    | A                  |                    |
| 5          | 4668289                  | 11.8603     | rs4407602  | 0.792              | A                  |      |                    | A     | A     | A   | A                  | A   | A    | A                  | A    | A    | A                  |                    |
| 5          | 4668593                  | 11.8618     | rs7731649  | 0.235              |                    |      |                    |       | A     | A   | A                  | A   | A    | A                  | A    | A    | A                  |                    |
| 5          | 4670864                  | 11.8647     | rs7724465  | 0.058              | B                  |      |                    | B     | B     | B   | B                  | B   | B    | B                  | B    | B    | B                  |                    |
| 5          | 4671383                  | 11.8653     | rs6555306  | 0.111              | B                  |      |                    | B     | B     | B   | B                  | B   | B    | B                  | B    | B    | B                  |                    |
| 5          | 4673835                  | 11.8872     | rs7720816  | 0.429              | B                  | B    | B                  | B     | B     | B   | B                  | B   | B    | B                  | B    | B    | B                  |                    |
| 5          | 4674868                  | 11.9199     | rs4412086  | 0.425              | A                  | A    | A                  | A     |       |     | A                  | A   | A    | A                  | A    | A    | A                  |                    |
| 5          | 4675355                  | 11.9355     | rs7716432  | 0.549              | A                  | A    | A                  | A     |       | A   | A                  | A   | A    | A                  | A    | A    | A                  |                    |
| 5          | 4676429                  | 11.9564     | rs4568336  | 0.987              | A                  | A    | A                  | A     | A     | A   | A                  | A   | A    | A                  | A    | A    | A                  |                    |
| 5          | 4677722                  | 11.9819     | rs13359697 | 0.172              | B                  |      | B                  | B     | B     | B   | B                  | B   | B    | B                  | B    | B    | B                  |                    |
| 5          | 4678192                  | 11.983      | rs7713482  | 0.607              |                    |      |                    |       | A     | A   | A                  | A   | A    | A                  | A    | A    | A                  |                    |
| 5          | 4678221                  | 11.9831     | rs10063789 | 0.836              | A                  |      | A                  | A     | A     | A   | A                  | A   | A    | A                  | A    | A    | A                  |                    |
| 5          | 4678287                  | 11.9831     | rs7718402  | 0.934              | A                  | A    | A                  | A     | A     | A   | A                  | A   | A    | A                  | A    | A    | A                  |                    |
| 5          | 4679559                  | 11.9836     | rs4235620  | 0.73               |                    |      |                    |       | A     | A   | A                  | A   | A    | A                  | A    | A    | A                  |                    |
| 5          | 4680691                  | 11.9839     | rs4563594  | 0.119              | B                  | B    | B                  | B     | B     | B   | B                  | B   | B    | B                  | B    | B    | B                  |                    |
| 5          | 4692090                  | 11.9878     | rs11134066 | 0                  | B                  | B    | B                  | B     | B     | B   | B                  | B   | B    | B                  | B    | B    | B                  |                    |
| 5          | 4695085                  | 11.9904     | rs6885274  | 0.938              | A                  | A    | A                  | A     | A     | A   | A                  | A   | A    | A                  | A    | A    | A                  |                    |
| 5          | 4700587                  | 11.9962     | rs4702913  | 0.164              |                    | B    |                    |       | B     |     | B                  | B   | B    | B                  | B    | B    | B                  |                    |
| 5          | 4705982                  | 11.9983     | rs12716162 | 0.854              | A                  | A    | A                  | A     |       | A   | A                  | A   | A    | A                  | A    | A    | A                  |                    |
| 5          | 4706519                  | 11.9985     | rs4532332  | 0.805              |                    |      |                    |       | A     |     | A                  | A   | A    | A                  | A    | A    | A                  |                    |
| 5          | 4717060                  | 11.9999     | rs2047728  | 0.585              |                    | A    |                    |       | A     |     | A                  | A   | A    | A                  | A    | A    | A                  |                    |
| 5          | 4723324                  | 12.002      | rs6890255  | 0.954              | A                  | A    | A                  | A     | A     | A   | A                  | A   | A    | A                  | A    | A    | A                  |                    |
| 5          | 4724332                  | 12.0034     | rs7711434  | 0.832              |                    |      | A                  | A     | A     | A   | A                  | A   | A    | A                  | A    | A    | A                  |                    |
| 5          | 4725405                  | 12.0044     | rs10035433 | 0.889              | A                  | A    | A                  | A     | A     | A   | A                  | A   | A    | A                  | A    | A    | A                  |                    |
| 5          | 4727057                  | 12.0049     | rs17750180 | 0.934              | A                  | A    | A                  | A     | A     | A   | A                  | A   | A    | A                  | A    | A    | A                  |                    |
| 5          | 4730319                  | 12.0088     | rs6895818  | 0.915              | A                  | A    | A                  | A     | A     | A   | A                  | A   | A    | A                  | A    | A    | A                  |                    |
| 5          | 4734171                  | 12.0224     | rs2134180  | 0.356              |                    | B    | B                  | B     | B     | B   | B                  | B   | B    | B                  | B    | B    | B                  |                    |
| 5          | 4738222                  | 12.023      | rs1393120  | 0.1                | B                  |      | B                  | B     | B     | B   | B                  | B   | B    | B                  | B    | B    | B                  |                    |
| 5          | 4755398                  | 12.0281     | rs7716642  | 0.827              | B                  |      |                    |       |       |     | B                  |     |      |                    |      |      |                    |                    |
| 5          | 4761704                  | 12.0313     | rs1501760  | 0.699              | B                  |      |                    |       |       |     | B                  |     |      |                    |      |      |                    |                    |
| 5          | 4776191                  | 12.0387     | rs2088900  | 0.341              |                    | B    | B                  |       |       | B   |                    |     | B    | B                  | B    | B    | B                  |                    |
| 5          | 4776500                  | 12.0407     | rs4235550  | 0.893              |                    |      |                    | B     |       |     |                    |     | B    | B                  | B    | B    | B                  |                    |
| 5          | 4777480                  | 12.0466     | rs10069581 | 0.093              | B                  | B    | B                  | B     | B     | B   | B                  | B   | B    | B                  | B    | B    | B                  |                    |
| 5          | 4780629                  | 12.0758     | rs16874044 | 0.15               | B                  | B    | B                  | B     | B     | B   | B                  | B   | B    | B                  | B    | B    | B                  |                    |
| 5          | 4781079                  | 12.0786     | rs1501754  | 1                  | A                  | A    | A                  | A     | A     | A   | A                  | A   | A    | A                  | A    | A    | A                  |                    |
| 5          | 4784657                  | 12.0795     | rs1173229  | 0.239              |                    | B    | B                  |       |       | B   | B                  | B   | B    | B                  | B    | B    | B                  |                    |
| 5          | 4785389                  | 12.0797     | rs1173228  | 0.717              |                    | A    | A                  |       |       | A   | A                  | A   | A    | A                  | A    | A    | A                  |                    |
| 5          | 4785594                  | 12.0797     | rs1173227  | 0.717              |                    | A    | A                  |       |       | A   | A                  | A   | A    | A                  | A    | A    | A                  |                    |
| 5          | 4788892                  | 12.0809     | rs1173218  | 0.279              |                    | B    | B                  |       |       | B   | B                  | B   | B    | B                  | B    | B    | B                  |                    |
| 5          | 4795354                  | 12.0894     | rs1452040  | 0.754              |                    | A    | A                  |       |       | A   | A                  | A   | A    | A                  | A    | A    | A                  |                    |
| 5          | 4801119                  | 12.1016     | rs10051649 | 0.283              |                    | B    | B                  |       |       | B   | B                  | B   | B    | B                  | B    | B    | B                  |                    |
| 5          | 4801996                  | 12.1209     | rs7728112  | 0.947              | A                  | A    | A                  | A     | A     | A   | A                  | A   | A    | A                  | A    | A    | A                  |                    |
| 5          | 4803549                  | 12.1286     | rs1173179  | 0.597              |                    | A    |                    |       |       | A   |                    | A   | A    | A                  | A    | A    | A                  |                    |
| 5          | 4814945                  | 12.1543     | rs1173192  | 0.173              | B                  | B    | B                  | B     | B     | B   | B                  | B   | B    | B                  | B    | B    | B                  |                    |
| 5          | 4819918                  | 12.1554     | rs1173201  | 0.112              | B                  | B    | B                  | B     | B     | B   | B                  | B   | B    | B                  | B    | B    | B                  |                    |
| 5          | 4821758                  | 12.1554     | rs10063051 | 0.004              | B                  | B    | B                  | B     | B     | B   | B                  | B   | B    | B                  | B    | B    | B                  |                    |
| 5          | 4824652                  | 12.1556     | rs10036366 | 0                  | B                  | B    | B                  | B     | B     | B   | B                  | B   | B    | B                  | B    | B    | B                  |                    |
| 5          | 4825401                  | 12.1556     | rs1173213  | 0.814              | A                  | A    | A                  | A     | A     | A   | A                  | A   | A    | A                  | A    | A    | A                  |                    |
| 5          | 4827086                  | 12.1559     | rs10073827 | 0                  | B                  | B    | B                  | B     | B     | B   | B                  | B   | B    | B                  | B    | B    | B                  |                    |
| 5          | 4828015                  | 12.156      | rs11134077 | 0.05               | B                  | B    | B                  | B     | B     | B   | B                  | B   | B    | B                  | B    | B    | B                  |                    |
| 5          | 4831601                  | 12.1563     | rs816475   | 0.889              | A                  | A    | A                  | A     | A     | A   | A                  | A   | A    | A                  | A    | A    | A                  |                    |
| 5          | 4831687                  | 12.1563     | rs2123104  | 0.94               | A                  | A    | A                  | A     | A     | A   | A                  | A   | A    | A                  | A    | A    | A                  |                    |
| 5          | 4835205                  | 12.1602     | rs816480   | 0.124              | B                  | B    | B                  | B     | B     | B   | B                  | B   | B    | B                  | B    | B    | B                  |                    |
| 5          | 4839617                  | 12.1611     | rs10512749 | 0.062              | B                  | B    | B                  | B     | B     | B   | B                  | B   | B    | B                  | B    | B    | B                  |                    |
| 5          | 4840284                  | 12.1612     | rs2652227  | 0.071              | B                  | B    | B                  | B     | B     | B   | B                  | B   | B    | B                  | B    | B    | B                  |                    |
| 5          | 4844322                  | 12.1617     | rs2652221  | 0.969              | A                  | A    | A                  | A     | A     | A   | A                  | A   | A    | A                  | A    | A    | A                  |                    |
| 5          | 4853391                  | 12.1627     | rs860987   | 0.876              | A                  | A    | A                  | A     | A     | A   | A                  | A   | A    | A                  | A    | A    | A                  |                    |
| 5          | 4861432                  | 12.1631     | rs2600642  | 0.005              | B                  | B    | B                  | B     | B     | B   | B                  | B   | B    | B                  | B    | B    | B                  |                    |
| 5          | 4867913                  | 12.1653     | rs707645   | 0.869              | A                  | A    | A                  | A     | A     | A   | A                  | A   | A    | A                  | A    | A    | A                  |                    |
| 5          | 4872310                  | 12.1678     | rs816467   | 0.062              | B                  | B    | B                  | B     | B     | B   | B                  | B   | B    | B                  | B    | B    | B                  |                    |
| 5          | 4872511                  | 12.1679     | rs816468   | 0.841              | A                  | A    | A                  | A     | A     | A   | A                  | A   | A    | A                  | A    | A    | A                  |                    |
| 5          | 4875420                  | 12.1702     | rs16874171 | 0.048              | B                  | B    | B                  | B     | B     | B   | B                  | B   | B    | B                  | B    | B    | B                  |                    |
| 5          | 4884392                  | 12.1738     | rs7728954  | 0.938              | A                  | A    | A                  | A     | A     | A   | A                  | A   | A    | A                  | A    | A    | A                  |                    |
| 5          | 4885068                  | 12.1745     | rs629342   | 0.478              |                    | A    |                    |       |       | A   |                    |     |      |                    |      |      |                    |                    |
| 5          | 4885562                  | 12.1753     | rs17752880 | 0.442              |                    | A    |                    |       |       | A   |                    |     |      |                    |      |      |                    |                    |
| 5          | 4887171                  | 12.1769     | rs10051514 | 0.403              |                    | B    |                    |       |       | B   |                    |     |      |                    |      |      |                    |                    |
| 5          | 4888934                  | 12.1797     | rs11857958 | 0.554              |                    |      |                    |       |       |     |                    |     |      |                    |      |      |                    |                    |
| 5          | 4900062                  | 12.1975     | rs590199   | 0.08               | B                  | B    | B                  | B     | B     | B   | B                  | B   | B    | B                  | B    | B    | B                  |                    |
| 5          | 4901816                  | 12.2051     | rs26875    | 0.836              | A                  | A    | A                  | A     | A     | A   | A                  | A   | A    | A                  | A    | A    | A                  |                    |
| 5          | 4905892                  | 12.2402     | rs26880    | 0.535              | B                  | B    | B                  | B     | B     | B   | B                  | B   | B    | B                  | B    | B    | B                  |                    |
| 5          | 4907084                  | 12.2483     | rs6894984  | 0.06               | B                  | B    | B                  | B     | B     | B   | B                  | B   | B    | B                  | B    | B    | B                  |                    |
| 5          | 4907778                  | 12.252      | rs1392411  | 0.562              | A                  | A    | A                  | A     | A     | A   | A                  | A   | A    | A                  | A    | A    | A                  |                    |
| 5          | 4912310                  | 12.261      | rs610722   | 0.372              | A                  |      |                    |       |       | A   |                    |     |      |                    |      |      |                    |                    |
| 5          | 4912405                  | 12.2611     | rs9885575  | 0                  | B                  | B    | B                  | B     | B     | B   | B                  | B   | B    | B                  | B    | B    | B                  |                    |
| 5          | 4913228                  | 12.2628     | rs6879578  | 0.991              | A                  | A    | A                  | A     | A     | A   | A                  | A   | A    | A                  | A    | A    | A                  |                    |
| 5          | 4914886                  | 12.2661     | rs6555321  | 0.487              | A                  | A    | A                  | A     | A     | A   | A                  | A   | A    | A                  | A    | A    | A                  |                    |
| 5          | 4917365                  | 12.2709     | rs484696   | 0.314              | B                  |      | B                  |       |       | B   |                    |     |      | B                  | B    | B    | B                  |                    |
| 5          | 4924195                  | 12.2734     | rs10475277 | 0                  | B                  | B    | B                  | B     | B     | B   | B                  | B   | B    | B                  | B    | B    | B                  |                    |
| 5          | 4928318                  | 12.2752     | rs501031   | 0.681              |                    |      | A                  |       |       | A   |                    |     |      | A                  | A    | A    | A                  |                    |
| 5          | 4928520                  | 12.2754     | rs502854   | 0.308              | B                  |      | B                  |       |       | B   |                    |     |      | B                  | B    | B    | B                  |                    |
| 5          | 4930407                  | 12.2824     | rs30452    | 0.664              | A                  |      | A                  |       |       | A   |                    |     |      | A                  | A    | A    | A                  |                    |
| 5          | 4936235                  | 12.2956     | rs654685   | 0.708              |                    |      |                    |       |       | A   |                    |     |      |                    |      |      |                    |                    |
| 5          | 4937880                  | 12.2981     | rs12521477 | 0.738              |                    |      |                    |       |       | A   |                    |     |      |                    |      |      |                    |                    |
| 5          | 4938130                  | 12.2987     | rs609096   | 0.814              |                    | A    | A                  |       |       | A   |                    |     |      |                    |      |      |                    |                    |
| 5          | 4938756                  | 12.3013     | rs596041   | 0.032              | B                  | B    | B                  | B     | B     | B   | B                  | B   | B    | B                  | B    | B    | B                  |                    |
| 5          | 4938915                  | 12.3021     | rs6868240  | 0.886              | A                  |      |                    | A     | A     | A   | A                  | A   | A    | A                  | A    | A    | A                  |                    |
| 5          | 4941242                  | 12.3567     | rs11134086 | 0.746              |                    | A    | A                  |       |       | A   |                    |     |      |                    |      |      |                    |                    |
| 5          | 4945124                  | 12.3657     | rs30448    | 0.996              | A                  | A    | A                  | A     | A     | A   | A                  | A   | A    | A                  | A    | A    | A                  |                    |
| 5          | 4946412                  | 12.3664     | rs30445    | 0.73               |                    | A    |                    |       |       | A   |                    |     |      |                    |      |      |                    |                    |
| 5          | 4948424                  | 12.3685     | rs643466   | 0.27               |                    | B    | B                  |       |       | B   |                    |     |      |                    |      |      |                    |                    |
| 5          | 4948859                  | 12.3866     | rs466277   |                    |                    |      |                    |       |       |     |                    |     |      |                    |      |      |                    |                    |

| Chromosome | Physical position (hg19) | Genetic map | rs number  | Allele A frequency | Family 2 (GC15626) |      | Family 3 (GC15119) |       |       |     | Family 4 (GC13840) |     |      | Family 5 (GC19075) |      |      | Family 6 (GC15475) | Family 7 (GC11709) |
|------------|--------------------------|-------------|------------|--------------------|--------------------|------|--------------------|-------|-------|-----|--------------------|-----|------|--------------------|------|------|--------------------|--------------------|
|            |                          |             |            |                    | IV:5               | IV:6 | IV:III             | IV:II | III:1 | V:1 | II:1               | I:1 | II:2 | III:4              | II:3 | II:2 | I:1                | II:1               |
| 5          | 5032533                  | 12.5136     | rs6878673  | 0.426              |                    |      |                    |       | A     |     |                    |     | A    |                    |      |      |                    | A                  |
| 5          | 5037512                  | 12.5344     | rs16874610 | 0.031              | B                  | B    | B                  | B     | B     | B   | B                  | B   | B    | B                  | B    | B    | B                  | B                  |
| 5          | 5038540                  | 12.535      | rs446464   | 0.075              | B                  | B    | B                  | B     | B     | B   | B                  | B   | B    | B                  | B    | B    | B                  | B                  |
| 5          | 5051464                  | 12.5449     | rs272194   | 0.692              | A                  | A    | A                  | A     | A     | A   | A                  | A   | A    | A                  | A    | A    | A                  | A                  |
| 5          | 5052953                  | 12.5455     | rs16874638 | 0.031              |                    |      |                    |       |       |     |                    |     |      |                    |      |      |                    |                    |
| 5          | 5052998                  | 12.5455     | rs272195   | 0.31               | B                  | B    | B                  | B     | B     | B   | B                  | B   | B    | B                  | B    | B    | B                  | B                  |
| 5          | 5062490                  | 12.5524     | rs272162   | 0.053              | B                  | B    | B                  | B     | B     | B   | B                  | B   | B    | B                  | B    | B    | B                  | B                  |
| 5          | 5063242                  | 12.5527     | rs156251   | 0.894              | B                  |      |                    |       |       |     |                    |     | B    |                    | B    |      | B                  |                    |
| 5          | 5072083                  | 12.5751     | rs270642   | 0.977              | A                  | A    | A                  | A     | A     | A   | A                  | A   | A    | A                  | A    | A    | A                  | A                  |
| 5          | 5074825                  | 12.5776     | rs270636   | 0.381              | B                  | B    | B                  |       |       |     |                    |     | B    | B                  | B    | B    | B                  | B                  |
| 5          | 5078313                  | 12.5802     | rs3733787  | 0.438              |                    | A    | A                  |       |       |     |                    |     | A    |                    |      |      | A                  |                    |
| 5          | 5080435                  | 12.5816     | rs6866197  | 1                  | A                  | A    | A                  | A     | A     | A   | A                  | A   | A    | A                  | A    | A    | A                  | A                  |
| 5          | 5084233                  | 12.5845     | rs899556   | 0.602              | A                  | A    | A                  |       |       |     |                    |     | A    | A                  | A    | A    | A                  | A                  |
| 5          | 5089229                  | 12.5852     | rs1382896  | 0.592              | A                  | A    | A                  |       |       |     |                    |     | A    | A                  | A    | A    | A                  | A                  |
| 5          | 5093172                  | 12.5868     | rs2619799  | 0.602              | A                  | A    | A                  |       |       |     |                    |     | A    | A                  | A    | A    | A                  | A                  |
| 5          | 5093643                  | 12.5869     | rs1160800  | 0.602              | A                  | A    | A                  |       |       |     |                    |     | A    | A                  | A    | A    | A                  | A                  |
| 5          | 5098840                  | 12.5889     | rs814797   | 0.379              | B                  | B    | B                  |       |       | B   |                    |     | B    |                    |      |      | B                  | B                  |
| 5          | 5106180                  | 12.5909     | rs16874709 | 0.858              |                    | A    | A                  | A     | A     | A   | A                  | A   | A    | A                  | A    | A    | A                  |                    |
| 5          | 5110692                  | 12.5955     | rs814790   | 0.367              |                    |      |                    |       |       |     |                    |     | A    |                    |      |      | A                  |                    |
| 5          | 5116544                  | 12.7194     | rs2115010  | 0.177              | B                  | B    | B                  | B     | B     | B   | B                  | B   | B    | B                  | B    | B    | B                  | B                  |
| 5          | 5120745                  | 12.7211     | rs814783   | 0.65               |                    |      | A                  | A     |       |     |                    |     | A    | A                  |      |      |                    |                    |
| 5          | 5120776                  | 12.7211     | rs861512   | 0.465              |                    |      | A                  | A     |       |     |                    |     | A    | A                  |      |      |                    |                    |
| 5          | 5121337                  | 12.7213     | rs1834925  | 0.819              | A                  | A    | A                  | A     | A     | A   | A                  | A   | A    | A                  | A    | A    | A                  | A                  |
| 5          | 5123214                  | 12.7221     | rs9313102  | 0.19               | B                  | B    | B                  | B     | B     | B   | B                  | B   | B    | B                  | B    | B    | B                  | B                  |
| 5          | 5124149                  | 12.7227     | rs270188   | 0.845              | A                  |      | A                  | A     |       |     |                    |     | A    | A                  |      |      |                    | A                  |
| 5          | 5124263                  | 12.7229     | rs270187   | 0.358              |                    |      | B                  | B     |       | B   |                    |     | B    | B                  |      |      |                    |                    |
| 5          | 5124549                  | 12.7237     | rs16874791 | 0.805              |                    | A    | A                  | A     | A     | A   |                    |     | A    | A                  | A    | A    | A                  | A                  |
| 5          | 5125959                  | 12.7287     | rs10475286 | 0.819              | A                  | A    | A                  | A     | A     | A   | A                  | A   | A    | A                  | A    | A    | A                  | A                  |
| 5          | 5126400                  | 12.7313     | rs10042501 | 0.181              | B                  | B    | B                  | B     | B     | B   | B                  | B   | B    | B                  | B    | B    | B                  | B                  |
| 5          | 5128141                  | 12.7434     | rs814776   | 0.035              |                    |      |                    |       |       |     |                    |     |      |                    |      |      |                    |                    |
| 5          | 5129879                  | 12.7678     | rs12516403 | 0.805              |                    | A    | A                  | A     | A     | A   |                    |     | A    | A                  | A    | A    | A                  |                    |
| 5          | 5133444                  | 12.8448     | rs751905   | 0.664              |                    |      |                    |       |       |     |                    |     | B    |                    | B    |      |                    |                    |
| 5          | 5136207                  | 12.9044     | rs7720806  | 0.699              |                    |      | A                  |       |       |     |                    |     | A    | A                  |      |      | A                  |                    |
| 5          | 5140970                  | 13.0286     | rs270206   | 0.712              |                    | A    |                    |       |       |     | A                  |     | A    | A                  |      |      |                    | A                  |
| 5          | 5141905                  | 13.0529     | rs270198   | 0.427              | B                  | B    |                    |       |       |     |                    |     | B    |                    |      |      | B                  | B                  |
| 5          | 5142460                  | 13.054      | rs2291112  | 0.376              | B                  | B    |                    |       | B     |     |                    |     | B    |                    |      |      | B                  | B                  |
| 5          | 5142768                  | 13.0542     | rs270193   | 0.611              | A                  | A    |                    |       |       |     |                    |     | A    |                    |      |      | A                  | A                  |
| 5          | 5145406                  | 13.056      | rs1863970  | 0.273              | B                  | B    |                    | B     | B     |     |                    |     | B    |                    | B    |      | B                  | B                  |
| 5          | 5146395                  | 13.0574     | rs1863968  | 0.381              | B                  | B    |                    | B     | B     |     |                    |     | B    |                    | B    |      | B                  | B                  |
| 5          | 5147125                  | 13.0587     | rs10512769 | 0.836              | A                  | A    | A                  | A     | A     | A   | A                  | A   | A    | A                  | A    | A    | A                  | A                  |
| 5          | 5147376                  | 13.0592     | rs2255273  | 0.894              | A                  | A    | A                  | A     | A     | A   | A                  | A   | A    | A                  | A    | A    | A                  | A                  |
| 5          | 5149621                  | 13.0607     | rs2560412  | 0.212              | B                  | B    |                    | B     | B     |     |                    |     | B    |                    | B    |      | B                  | B                  |
| 5          | 5152447                  | 13.0612     | rs11134095 | 0.156              | B                  | B    |                    | B     | B     |     |                    |     | B    |                    | B    |      | B                  | B                  |
| 5          | 5153648                  | 13.062      | rs978280   | 0.549              | B                  | B    |                    | B     | B     |     |                    |     | B    |                    | B    |      | B                  | B                  |
| 5          | 5153911                  | 13.0623     | rs16874878 | 0.186              | B                  | B    |                    | B     | B     |     |                    |     | B    |                    | B    |      | B                  | B                  |
| 5          | 5154215                  | 13.0626     | rs922542   | 0.637              | A                  | A    |                    | A     | A     | A   |                    |     | A    |                    | A    | A    | A                  | A                  |
| 5          | 5154458                  | 13.0634     | rs6555331  | 0.544              | B                  | B    |                    | B     | B     |     |                    |     | B    |                    |      |      | B                  | B                  |
| 5          | 5155357                  | 13.0666     | rs814775   | 0.681              | A                  | A    | A                  | A     | A     | A   |                    |     | A    |                    | A    | A    | A                  | A                  |
| 5          | 5156655                  | 13.0686     | rs6899080  | 0.673              | B                  | B    |                    | B     | B     |     |                    |     | B    |                    |      |      | B                  |                    |
| 5          | 5159316                  | 13.0708     | rs7720897  | 0.217              | B                  | B    |                    | B     | B     |     |                    |     | B    |                    | B    |      | B                  | B                  |
| 5          | 5160481                  | 13.0717     | rs10067690 | 0.155              | B                  | B    |                    | B     | B     |     |                    |     | B    |                    | B    |      | B                  | B                  |
| 5          | 5162228                  | 13.073      | rs992542   | 0.73               | A                  | A    |                    | A     | A     | A   |                    |     | A    |                    | A    | A    | A                  | A                  |
| 5          | 5164175                  | 13.0745     | rs7705998  | 0.941              | A                  | A    | A                  | A     | A     | A   | A                  | A   | A    | A                  | A    | A    | A                  | A                  |
| 5          | 5165415                  | 13.076      | rs270178   | 0.513              | B                  | B    |                    | B     | B     |     |                    |     | B    |                    |      |      | B                  |                    |
| 5          | 5165870                  | 13.0835     | rs874428   | 0.161              |                    | B    |                    | B     | B     |     |                    |     | B    |                    | B    |      | B                  |                    |
| 5          | 5165952                  | 13.0849     | rs1079295  | 0.354              | B                  | B    |                    | B     | B     |     |                    |     | B    |                    | B    |      | B                  | B                  |
| 5          | 5167587                  | 13.0926     | rs997427   | 0.45               | B                  | B    |                    | B     | B     |     |                    |     | B    |                    | B    |      | B                  | B                  |
| 5          | 5167648                  | 13.0927     | rs997428   | 0.876              | A                  | A    | A                  | A     | A     | A   | A                  | A   | A    | A                  | A    | A    | A                  | A                  |
| 5          | 5176672                  | 13.1156     | rs4701693  | 0.129              | B                  | B    | B                  | B     | B     |     |                    |     | B    |                    | B    |      | B                  | B                  |
| 5          | 5178624                  | 13.117      | rs4702234  | 0.615              |                    | A    | A                  | A     | A     |     |                    |     | A    |                    | A    | A    |                    | A                  |
| 5          | 5181634                  | 13.1192     | rs13177816 | 0.366              |                    | A    | A                  |       |       |     |                    |     | A    |                    |      |      |                    |                    |
| 5          | 5181829                  | 13.1196     | rs13176907 | 0.365              |                    | A    | A                  |       |       |     |                    |     | A    |                    |      |      |                    |                    |
| 5          | 5181928                  | 13.1203     | rs7724547  | 0.18               | B                  | B    | B                  |       |       |     |                    |     | B    |                    | B    |      | B                  |                    |
| 5          | 5183700                  | 13.1522     | rs1808529  | 0.792              | A                  | A    |                    | A     | A     | A   | A                  | A   | A    | A                  | A    | A    | A                  | A                  |
| 5          | 5183783                  | 13.1538     | rs10037656 | 0.907              | A                  | A    |                    | A     | A     | A   | A                  | A   | A    | A                  | A    | A    | A                  | A                  |
| 5          | 5184252                  | 13.1565     | rs12518196 | 0.245              |                    | B    | B                  | B     | B     | B   | B                  |     | B    |                    | B    |      | B                  | B                  |
| 5          | 5187371                  | 13.1636     | rs4702235  | 0.226              | B                  | B    |                    | B     | B     |     |                    |     | B    |                    | B    |      | B                  | B                  |
| 5          | 5191047                  | 13.1644     | rs11743270 | 0.96               | A                  | A    | A                  | A     | A     | A   | A                  | A   | A    | A                  | A    | A    | A                  | A                  |
| 5          | 5191117                  | 13.1645     | rs12517136 | 0.906              | A                  | A    | A                  | A     | A     | A   | A                  | A   | A    | A                  | A    | A    | A                  | A                  |
| 5          | 5192434                  | 13.1647     | rs12520783 | 0.093              | B                  | B    | B                  | B     | B     | B   | B                  | B   | B    | B                  | B    | B    | B                  | B                  |
| 5          | 5192861                  | 13.1648     | rs871122   | 0.115              | B                  | B    | B                  | B     | B     |     |                    |     | B    |                    | B    |      | B                  | B                  |
| 5          | 5195069                  | 13.1652     | rs10039354 | 0.221              | B                  | B    | B                  |       |       |     |                    |     | B    |                    | B    |      | B                  |                    |
| 5          | 5195384                  | 13.1658     | rs4701694  | 0.208              | B                  | B    | B                  | B     | B     | B   | B                  | B   | B    | B                  | B    | B    | B                  | B                  |
| 5          | 5195721                  | 13.1666     | rs16874994 | 0.907              | A                  | A    | A                  | A     | A     | A   | A                  | A   | A    | A                  | A    | A    | A                  | A                  |
| 5          | 5196007                  | 13.1671     | rs2081852  | 0.867              | A                  | A    | A                  | A     | A     | A   | A                  | A   | A    | A                  | A    | A    | A                  | A                  |
| 5          | 5197553                  | 13.1693     | rs3943879  | 0.419              | A                  | A    | A                  |       |       |     |                    |     | A    |                    | A    |      | A                  |                    |
| 5          | 5198567                  | 13.1697     | rs16875033 | 0.093              | B                  | B    | B                  | B     | B     | B   | B                  | B   | B    | B                  | B    | B    | B                  | B                  |
| 5          | 5199350                  | 13.1701     | rs1346460  | 0.167              | B                  | B    | B                  | B     | B     | B   | B                  | B   | B    | B                  | B    | B    | B                  | B                  |
| 5          | 5199787                  | 13.1703     | rs1428027  | 0.106              | B                  | B    | B                  | B     | B     | B   | B                  | B   | B    | B                  | B    | B    | B                  | B                  |
| 5          | 5200281                  | 13.1709     | rs6555335  | 0.804              | A                  | A    | A                  | A     | A     | A   | A                  | A   | A    | A                  | A    | A    | A                  | A                  |
| 5          | 5200490                  | 13.1717     | rs17762877 | 0.576              | B                  | B    | B                  |       |       |     |                    |     | B    |                    |      |      | B                  |                    |
| 5          | 5202232                  | 13.1735     | rs4702241  | 0.155              | B                  | B    | B                  | B     | B     | B   | B                  |     | B    |                    | B    |      | B                  | B                  |
| 5          | 5202753                  | 13.1757     | rs979708   | 0.783              | A                  | A    | A                  | A     | A     | A   | A                  | A   | A    | A                  | A    | A    | A                  | A                  |
| 5          | 5203046                  | 13.1768     | rs979710   | 0.876              | A                  | A    | A                  | A     | A     | A   | A                  | A   | A    | A                  | A    | A    | A                  | A                  |
| 5          | 5203600                  | 13.1775     | rs1428024  | 0.907              | A                  | A    | A                  | A     | A     | A   | A                  | A   | A    | A                  | A    | A    | A                  | A                  |
| 5          | 5204149                  | 13.1783     | rs1366165  | 0.296              | B                  | B    | B                  |       |       |     |                    |     | B    |                    | B    |      | B                  |                    |
| 5          | 5208254                  | 13.2474     | rs6888758  | 0.584              | A                  |      | A                  |       |       |     |                    |     | A    |                    | A    |      | A                  |                    |
| 5          | 5209210                  | 13.3266     | rs16875054 | 0.027              | B                  | B    | B                  | B     | B     | B   | B                  | B   | B    | B                  | B    | B    | B                  | B                  |
| 5          | 5209872                  | 13.3627     | rs2019251  | 0.721              | A                  | A    |                    |       |       |     |                    |     | A    |                    | A    |      | A                  |                    |
| 5          | 5210050                  | 13.3629     | rs1560063  | 0.735              | A                  | A    | A                  | A     | A     | A   |                    |     | A    |                    | A    |      | A                  |                    |
| 5          | 5210315                  | 13.3631     | rs7704912  | 0.339              |                    |      | B                  | B     |       |     | B                  | A   |      |                    |      | B    | B                  | B                  |
| 5          | 5214077                  | 13.3652     | rs1019748  | 0.35               |                    |      | B                  | B     |       |     | B                  |     |      |                    | B    | B    | B                  |                    |
| 5          | 5221300                  | 13.3711     | rs1560062  | 0.863              |                    |      |                    |       |       |     |                    | A   |      | A                  |      |      |                    |                    |
| 5          | 5222336                  | 13.3727     | rs4702248  | 0.54               |                    |      | B                  | B     |       |     | B                  |     |      | A                  |      |      |                    |                    |
| 5          | 5224299                  | 13.3742     | rs16875084 | 0.19               | B                  | B    | B                  | B     | B     | B   | B                  |     | B    |                    | B    |      | B                  | B                  |
| 5          | 5225032                  | 13.3743     | rs2964444  | 0.327              | B                  | B    |                    |       |       |     |                    |     | B    |                    | B    |      | B                  | B                  |
| 5          | 5226211                  | 13.3744     | rs2913615  | 0.655              |                    |      | A                  | A     |       |     |                    |     | B    |                    |      | A    | A                  | A                  |
| 5          | 5227291                  | 13.3745     | rs12652633 | 0.934              | A                  | A    | A                  | A     | A     | A   |                    |     | A    |                    | A    |      | A                  | A                  |
